1 **Title (108 characters): Childhood obesity is linked to putative neuroinflammation in brain white**  
2 **matter, hypothalamus, and striatum**

3  
4 **Running title (45 characters):** Brain microstructure in children with obesity  
5

6 **Authors:** Zhaolong Li, BA<sup>1,2</sup>, Amjad Samara, MD<sup>1,3</sup>, Mary Katherine Ray, PhD<sup>1</sup>, Jerrel Rutlin, BS<sup>1</sup>,  
7 Cyrus A. Raji, MD, PhD<sup>3,4</sup>, Joshua S. Shimony, MD, PhD<sup>4</sup>, Peng Sun, PhD<sup>4,a</sup>, Sheng-Kwei Song, PhD<sup>4</sup>,  
8 Tamara Hershey, PhD<sup>1,2,3,4,\*</sup>, Sarah A. Eisenstein, PhD<sup>1,4</sup>  
9

10 **Affiliations:**

11 <sup>1</sup>Department of Psychiatry, Washington University in St. Louis School of Medicine, St. Louis, MO  
12 63110, USA

13 <sup>2</sup>Department of Psychological and Brain Sciences, Washington University in St. Louis, St. Louis, MO  
14 63130, USA

15 <sup>3</sup>Department of Neurology, Washington University in St. Louis School of Medicine, St. Louis, MO  
16 63110, USA

17 <sup>4</sup>Mallinckrodt Institute of Radiology, Washington University in St. Louis School of Medicine, St. Louis,  
18 MO 63110, USA

19 <sup>a</sup>Present address: Department of Imaging Physics, University of Texas MD Anderson Cancer Center,  
20 Houston, TX 77030, USA  
21

22 **\*Corresponding author:**

23 Tamara Hershey, PhD

24 James S. McDonnell Professor of Cognitive Neuroscience

25 Department of Psychiatry and Mallinckrodt Institute of Radiology

26 Washington University in St. Louis School of Medicine

27 St. Louis, MO 63110

28 MSC 8134-0070-02

29 Phone: (314)-362-5593

30 Email: [tammy@wustl.edu](mailto:tammy@wustl.edu)  
31

32 **Keywords (5):** diffusion MRI; hypothalamus; neuroinflammation; obesity; white matter  
33

34 **Word count in main text:** 6080

|    |                                                                          |
|----|--------------------------------------------------------------------------|
| 35 | <b>Abbreviations</b>                                                     |
| 36 | ABCD <sup>®</sup> , Adolescent Brain Cognitive Development <sup>SM</sup> |
| 37 | ADC, apparent diffusion coefficient                                      |
| 38 | ANOVA, analysis of variance                                              |
| 39 | AUC, area-under-the-curve                                                |
| 40 | BMI, body mass index                                                     |
| 41 | CI, confidence interval                                                  |
| 42 | DBSI, diffusion basis spectrum imaging                                   |
| 43 | DTI, diffusion tensor imaging                                            |
| 44 | DWI, diffusion-weighted image                                            |
| 45 | FA, fractional anisotropy                                                |
| 46 | FF, fiber fraction                                                       |
| 47 | FSL, FMRIB Software Library                                              |
| 48 | FWE, family-wise error                                                   |
| 49 | ICV, intracranial volume                                                 |
| 50 | MRI, magnetic resonance imaging                                          |
| 51 | NW, children with normal-weight                                          |
| 52 | OB, children with obesity                                                |
| 53 | OW, children with overweight                                             |
| 54 | PDS, pubertal development stage                                          |
| 55 | RF, restricted fraction                                                  |
| 56 | RNI, restricted normalized isotropic                                     |
| 57 | RSI, restriction spectrum imaging                                        |
| 58 | SD, standard deviation                                                   |
| 59 | SES, socioeconomic status                                                |
| 60 | TBSS, tract-based spatial statistics                                     |
| 61 | TFCE, threshold-free cluster enhancement                                 |
| 62 | WC, waist circumference                                                  |
| 63 | WM, white matter                                                         |

64 **Abstract (200 words)**

65 Neuroinflammation is both a consequence and driver of overfeeding and weight gain in rodent obesity  
66 models. Advances in magnetic resonance imaging (MRI) enable investigations of brain microstructure  
67 that suggests neuroinflammation in human obesity. To assess the convergent validity across MRI  
68 techniques and extend previous findings, we used diffusion basis spectrum imaging (DBSI) to  
69 characterize obesity-associated alterations in brain microstructure in 601 children (age 9-11 years) from  
70 the Adolescent Brain Cognitive Development<sup>SM</sup> Study. Compared to children with normal-weight, greater  
71 DBSI restricted fraction (RF), reflecting neuroinflammation-related cellularity, was seen in widespread  
72 white matter in children with overweight and obesity. Greater DBSI-RF in hypothalamus, caudate  
73 nucleus, putamen, and, in particular, nucleus accumbens, correlated with higher baseline body mass index  
74 (BMI) and related anthropometrics. Comparable findings were seen in the striatum with a previously  
75 reported restriction spectrum imaging (RSI) model. Gain in waist circumference over one and two years  
76 related, at nominal significance, to greater baseline RSI-assessed restricted diffusion in nucleus  
77 accumbens and caudate nucleus, and DBSI-RF in hypothalamus, respectively. Here we demonstrate that  
78 childhood obesity is associated with microstructural alterations in white matter, hypothalamus, and  
79 striatum. Our results also support the reproducibility, across MRI methods, of findings of obesity-related  
80 putative neuroinflammation in children.

81 **1. Introduction**

82 Childhood obesity is a major growing health issue, affecting over 340 million children worldwide  
83 in 2016 (World Health Organization, 2021). It is associated with expensive medical costs (Biener et al.,  
84 2020), lower quality of life (Killedar et al., 2020), and elevated risk for health complications including  
85 adult obesity, type 2 diabetes, and cardiovascular diseases (Liang et al., 2015; Simmonds et al., 2016).  
86 Accumulating evidence also identifies childhood obesity as a risk factor for cognitive dysfunction and  
87 Alzheimer’s disease in late-life (Tait et al., 2022). Given the brain’s prominent role in regulating feeding  
88 and metabolism, it is essential to understand the relationship between obesity and brain health.  
89 Determining which brain regions and networks might be involved in the development and maintenance of  
90 childhood obesity could help identify targets for obesity prevention and intervention, thereby mitigating  
91 short and long-term health consequences.

92 Obesity involves a chronic, low-grade, systemic inflammation affecting multiple organs (Gregor  
93 & Hotamisligil, 2011). In rodent models of obesity, high-fat diets induce inflammation in the central  
94 nervous system, or “neuroinflammation” (Baufeld et al., 2016; Buckman et al., 2013; De Souza et al.,  
95 2005; Décarie-Spain et al., 2018; Valdearcos et al., 2017), which in turn cause memory deficits and  
96 anxiodepressive behaviors (Beilharz et al., 2016; Décarie-Spain et al., 2018; Pistell et al., 2010). In  
97 humans, post-mortem tissue analyses have revealed associations between obesity and increased gliosis in  
98 multiple brain regions, including the hypothalamus, a key regulator of feeding and metabolism (Baufeld  
99 et al., 2016; Schur et al., 2015). Aimed at assessing brain health *in vivo*, a number of magnetic resonance  
100 imaging (MRI) studies have reported associations between obesity and altered brain structure. In adults,  
101 higher body mass index (BMI) and visceral fat are consistently linked to lower cortical thickness and  
102 smaller prefrontal and basal ganglia volumes (Fernández-Andújar et al., 2021; Gómez-Apo et al., 2021;  
103 Raji et al., 2010; Willette & Kapogiannis, 2015), potentially due to neuronal loss consequent of obesity-  
104 related neuroinflammation and/or microangiopathy (Gómez-Apo et al., 2021). These relationships are less  
105 clear in children (Willette & Kapogiannis, 2015). Adult obesity has also been associated with  
106 compromised white matter integrity, reflected by lower diffusion tensor imaging (DTI)-derived fractional

107 anisotropy (FA) and greater mean diffusivity of water, primarily in frontolimbic tracts and the corpus  
108 callosum (Daoust et al., 2021; Kullmann et al., 2015; Verstynen et al., 2012). However, opposite findings  
109 of greater white matter DTI-FA in obesity have also been noted (Birdsill et al., 2017; Carbine et al., 2020;  
110 Dekkers et al., 2019), and the relationship between obesity and white matter integrity in children remains  
111 unknown. Importantly, the standard single-tensor DTI model could be confounded by neuroinflammatory  
112 processes such as cellularity and edema (Kullmann et al., 2016; Wang et al., 2011, 2015; Winklewski et  
113 al., 2018), which may partially explain the mixed pattern of results.

114 In recent years, studies using multi-compartment diffusion MRI-based methods, though limited in  
115 number, have yielded consistent observations of putative neuroinflammation in feeding-related brain  
116 regions in obesity (Rapuano et al., 2020, 2022; Samara et al., 2020, 2021). The data-driven multi-tensor  
117 diffusion basis spectrum imaging (DBSI) technique models diffusion-weighted signals as a linear  
118 combination of discrete anisotropic tensors and isotropic diffusion spectra, enabling the *in vivo*  
119 assessment of brain microstructure (Cross & Song, 2017; Wang et al., 2011, 2015). DBSI metrics, though  
120 indirectly reflecting true anatomy, have been histopathologically validated as neuroinflammation-  
121 sensitive using rodent and human neural tissue in multiple sclerosis (Chiang et al., 2014; Wang et al.,  
122 2014; Wang et al., 2011, 2015), epilepsy (Zhan et al., 2018), and optic neuritis (Lin et al., 2017; Yang et  
123 al., 2021). Notably, applying DBSI to adults with obesity, we previously observed microstructural  
124 alterations in striatal and limbic regions that suggest cellularity, vasogenic edema, and lower apparent  
125 axonal and dendritic densities (Samara et al., 2020, 2021), in line with the obesity-related  
126 neuroinflammatory phenotype seen in animal and post-mortem human brain studies. In white matter  
127 tracts, we found evidence of increased and widespread DBSI-assessed putative neuroinflammation in  
128 young and middle-aged adults with obesity across two independent samples (Samara et al., 2020). DBSI  
129 has not yet been used to characterize brain microstructure in childhood obesity. However, Rapuano et al.,  
130 (2020) used restriction spectrum imaging (RSI), which in contrast to DBSI, models isotropic water  
131 diffusion components based on the ratio of radial and axial diffusivities (Palmer et al., 2022; White et al.,  
132 2013), and observed associations between greater purported striatal cellular density and higher baseline

133 and future waist circumference and BMI in children in the Adolescent Brain Cognitive Development<sup>SM</sup>  
134 (ABCD) Study (Rapuno et al., 2020, 2022). Furthermore, using a non-diffusion method, namely  
135 quantitative T2-weighted MRI, studies have reported that longer hypothalamic T2 relaxation time and  
136 greater T2 signal intensity, both suggestive of reactive microglial and astrocytic gliosis, relate to higher  
137 BMI in adults (Schur et al., 2015; Thaler et al., 2012) and children, including a subset from the ABCD  
138 Study<sup>®</sup> (Sewaybricker et al., 2019; Sewaybricker, Kee, et al., 2021; Sewaybricker, Melhorn, et al., 2021).  
139 Convergent findings amongst MRI methods in the same group of children would support the feasibility  
140 and reliability of these techniques to assess putative neuroinflammation in childhood obesity.

141 In this study, we used the baseline ABCD Study<sup>®</sup> data from 601 children aged 9-11 years (see  
142 **section 2.1** for details on sample selection) to test the *a priori* hypotheses that 1) obesity-associated  
143 microstructural alterations, including greater putative neuroinflammation-related cellularity (reflected by  
144 greater DBSI restricted fraction (RF)) and lower axonal and dendritic densities (reflected by lower DBSI  
145 fiber fraction (FF)) that we had observed in white matter and striatum in adults, and in one novel region  
146 not yet assessed using diffusion MRI, i.e., the hypothalamus, would also be present in children, and that  
147 2) greater hypothalamic and striatal cellularity (DBSI-RF) would relate to greater baseline waist  
148 circumference and BMI metrics in children, similar to the RSI cellular density metric, namely restricted  
149 normalized isotropic (RSI-RNI). We also explored associations between baseline DBSI and RSI metrics  
150 in the hypothalamus and striatum and one and two-year longitudinal changes in anthropometrics. If our  
151 results using DBSI are consistent to those in studies that used RSI and quantitative T2-weighted MRI,  
152 they will support the use of non-invasive MRI-based methods to characterize obesity-related putative  
153 neuroinflammation *in vivo* in humans, in the absence of histopathological validation.

154

## 155 **2. Materials and methods**

### 156 **2.1. Participants**

157 Participants were from the ABCD Study<sup>®</sup>, a ten-year, 21-site study tracking brain development in  
158 a diverse cohort of U.S. children and adolescents (Casey et al., 2018; Garavan et al., 2018; Jernigan et al.,

159 2018). Participants receive annual physical, sociocultural, and behavioral assessments, as well as  
160 neuroimaging and bioassays every two years. Institutional review boards at study sites approved study  
161 procedures; parents/caregivers provided written consent and children gave verbal assent. The ABCD  
162 Study<sup>®</sup> 2.0.1 release included data from 11,875 participants at baseline and 4,951 participants at one-year  
163 follow-up. In addition to the ABCD Study<sup>®</sup> inclusion/exclusion criteria (Garavan et al., 2018), we  
164 excluded participants with 1) missing anthropometric or demographic data at baseline or one-year follow-  
165 up; 2) current or past diagnosis of neurological (including cerebral palsy, brain tumor, stroke, aneurysm,  
166 brain hemorrhage, intellectual disability, lead poisoning, muscular dystrophy, multiple sclerosis, and  
167 others) and psychiatric (including schizophrenia, autism spectrum disorder, attention-deficit hyperactivity  
168 disorder, and others) conditions and diabetes, similar to Rapuano et al., (2020); and 3) T1 or diffusion-  
169 weighted images (DWIs) that did not pass quality control or had clinically significant incidental findings  
170 (Hagler et al., 2019; Li et al., 2021). Also consistent with Rapuano et al., (2020), in order to maximize  
171 harmonization of MRI data across sites, only scans performed on Siemens 3T Prisma platforms (Siemens  
172 Healthineers AG, Erlangen, Germany) were included. As the ABCD Study<sup>®</sup> 4.0 release became available  
173 during our study, we further included participants with complete data at two-year follow-up to extend  
174 exploratory longitudinal analyses. Lastly, because head motion during MRI scans is known to interfere  
175 with diffusion tensor model estimation and give spurious correlations (Ling et al., 2012; Yendiki et al.,  
176 2014), we excluded participants with excessive head motion (defined as mean DWI framewise  
177 displacement  $\geq 2.5$  mm) and covaried for mean head motion in statistical analyses.

178 Our inclusion/exclusion criteria selected a total of 1,613 qualifying participants (see  
179 **Supplementary Fig. 1** for flowchart). Age and sex-adjusted BMI percentiles at baseline were used to  
180 classify participants by weight status (Kuczmarski et al., 2002), including 63 with underweight (BMI < 5<sup>th</sup>  
181 percentile), 1,140 with normal-weight (NW; 5<sup>th</sup> to < 85<sup>th</sup> percentiles), 194 with overweight (OW; 85<sup>th</sup> to <  
182 95<sup>th</sup> percentiles), and 216 with obesity (OB;  $\geq 95^{\text{th}}$  percentile). To achieve balanced group sizes as well as  
183 reduce computational cost, we randomly selected 216 NW participants (matched to OB group size)  
184 stratified by sex, and included all 194 OW and 216 OB participants. After neuroimaging processing, data

185 from 25 participants were excluded due to missing/incomplete T1 or DWI acquisition, missing field  
186 maps, mismatch between field map and DWI dimensions, or missing/unclear DWI directions. The final  
187 analytical sample therefore included 212 NW, 187 OW, and 202 OB participants, for a total  $n = 601$ .  
188 Such sample size is similar to those in recent literature and should afford sufficient power to detect  
189 obesity-related microstructural alterations (see **Supplementary Methods** for power analysis) (Jiang et al.,  
190 2023; Sewaybricker, Kee, et al., 2021).

## 191 **2.2. Obesity-related measures**

192 Participant waist circumference (WC), weight, and height were measured at baseline and one and  
193 two-year follow-ups (Barch et al., 2018). Raw BMI was calculated ( $\text{weight}_{(\text{lbs})}/\text{height}_{(\text{in})}^2 \times 703$ ). BMI  $z$ -  
194 scores corrected for age and sex were computed using the 2000 CDC growth charts (Kuczmarski et al.,  
195 2002). These different measures were used to address the concern that a single index may be less  
196 reflective of true adiposity and/or sensitive to fat gain in children (Cole et al., 2005; Taylor et al., 2000).

## 197 **2.3. Neuroimaging**

### 198 **2.3.1. MRI acquisition**

199 Details on T1 and DWI acquisition and harmonization across sites are published elsewhere  
200 (Casey et al., 2018; Hagler et al., 2019). T1-weighted anatomical images were collected as a 3D T1-  
201 weighted inversion prepared RF-spoiled gradient echo scan, with voxel resolution =  $1 \text{ mm}^3$  isotropic. Spin  
202 echo echo-planar imaging was used to acquire multi-shell DWIs with the following parameters: total  
203 acquisition time = 7:31, repetition time = 4100 ms, time to echo = 88 ms, matrix size =  $140 \times 140 \times 81$ ,  
204 flip angle =  $90^\circ$ , acceleration factor = 3, and voxel resolution =  $1.7 \text{ mm}^3$  isotropic. DWIs were imaged  
205 with 7  $b = 0$  frames and 96 gradient directions ( $b$ 's = 500, 1000, 2000, and 3000  $\text{s/mm}^2$  with 6, 15, 15,  
206 and 60 directions, respectively).

### 207 **2.3.2. DWI and DBSI processing**

208 DWIs were corrected for susceptibility-induced distortion, eddy currents, and head motion using  
209 FMRIB Software Library (FSL) *topup* and *eddy* (Smith et al., 2004). Multi-tensor DBSI maps were  
210 estimated using an in-house script as previously described (Wang et al., 2011, 2015). Leveraging the



211 multi-shell DWI data, DBSI characterizes brain tissue microstructure by partitioning the total water  
212 diffusion signal within each image voxel into isotropic and anisotropic compartments. DBSI modeling  
213 produced maps of anisotropic fiber fraction (DBSI-FF; reflects axonal/dendritic density), isotropic  
214 nonrestricted fraction ( $f(D)$  at apparent diffusion coefficient (ADC)  $> 0.3 \mu\text{m}^2/\text{ms}$ ; reflects vasogenic  
215 edema/tissue disintegration/extracellular water), and isotropic restricted fraction (DBSI-RF;  $f(D)$  at  $0 <$   
216  $\text{ADC} \leq 0.3 \mu\text{m}^2/\text{ms}$ ; reflects intracellular water/inflammation-related cellularity) (Chiang et al., 2014; Sun  
217 et al., 2020; Wang et al., 2015). Details on DBSI model specification are provided in **Supplementary**  
218 **Methods**. Notably, DBSI-FF and RF are consistently lower and greater, respectively, in adult obesity  
219 (Samara et al., 2020, 2021) and serve as the neuroinflammation-related microstructural assessment in the  
220 current study. DBSI maps were registered to T1 space first using *epi\_reg* and a non-diffusion-weighted  
221 image, then by applying the transformation matrix to individual maps using *applyxfm*.

### 222 **2.3.3. Tract-based spatial statistics (TBSS)**

223 Voxel-wise analyses of white matter DBSI-FF and RF were performed using TBSS (Smith et al.,  
224 2006). The DTI model was fitted to preprocessed DWIs using FSL *dtifit*, and DTI-FA maps were eroded  
225 by one voxel with end slices removed. Cleaned DTI-FA images were nonlinearly registered to the T1-  
226 weighted image of a randomly selected NW participant, averaged, and assigned a threshold at  $\text{FA} > 0.2$  to  
227 create a white matter skeleton, onto which the DBSI-FF and RF maps were projected.

### 228 **2.3.4. Segmentation of the striatum and hypothalamus**

229 The nucleus accumbens, caudate nucleus, and putamen were segmented from T1-weighted  
230 images using FSL *FIRST* (Patenaude et al., 2011). The hypothalamus was segmented using a novel,  
231 automated algorithm developed with deep convolutional neural networks trained on adult data (Billot et  
232 al., 2020). To assess the algorithm's accuracy in children, we compared automated and manual  
233 hypothalamus segmentations in 20 participants (10 NW and 10 OB, randomly selected within each  
234 group). Within this group, the automated and manual segmentations had good spatial overlap (mean Dice  
235 similarity coefficient = 0.74,  $SD = 0.02$ , one-tailed  $p < 0.001$  against the conventional threshold of 0.7)  
236 and yielded highly correlated volumes ( $r = 0.74$ ,  $p < 0.001$ ). Neither spatial overlap nor volumetric

237 correlation between the automated and manual segmentations was different by weight group (NW vs. OB;  
238  $p$ 's = 0.58 and 0.97). Although the automated segmentations had smaller volumes than manual  
239 segmentations ( $means = 747$  and  $887 \text{ mm}^3$ ,  $p < 0.001$ ), such volume reduction primarily excluded voxels  
240 near the hypothalamic surface, reducing possible contamination of diffusion signal from neighboring  
241 cerebrospinal fluid and vasculature (**Supplementary Fig. 2**). Also, the segmented volumes were  
242 consistent with literature values (Neudorfer et al., 2020). Taken together, the automated algorithm reliably  
243 produced hypothalamus segmentations comparable to manual segmentation. For each subcortical  
244 structure, segmentations were visually inspected for accuracy before statistical analyses, and volume and  
245 DBSI-FF and RF metrics were each extracted and combined/averaged between hemispheres.

## 246 **2.4. Statistical analyses**

247 All analyses, except for TBSS, were performed in R version 4.2.1 (R Core Team, 2013).  
248 Differences in participant characteristics across NW, OW, and OB groups were assessed using analysis of  
249 variance (ANOVA) or chi-square tests.

### 250 **2.4.1. White matter**

251 For TBSS, we excluded data from 28 randomly selected siblings, eliminating family dependency  
252 confounds. Baseline DBSI-FF and RF in white matter tracts were compared amongst unrelated NW ( $n =$   
253  $202$ ), OW ( $n = 180$ ), and OB ( $n = 191$ ) participants using voxel-wise TBSS, first by ANOVAs for main  
254 effects of group and second by  $t$ -tests for between-group comparisons. FSL *Randomize* (null distribution  
255 built from 10,000 permutations; with recommended threshold-free cluster enhancement (TFCE)) was  
256 used for these comparisons with spatial family-wise error (FWE) rate corrected at two-tailed  $p \leq 0.05$   
257 (Winkler et al., 2014). Briefly, the raw statistical image was TFCE-transformed into an output image in  
258 which voxel-wise TFCE scores were weighted sums of local clustered signals, such that larger TFCE  
259 scores reflected magnitude of cluster-like spatial support greater than a given height (signal intensity) (Li  
260 et al., 2017; Smith & Nichols, 2009). We specified the  $-T2$  option in *Randomize* (2D optimization for  
261 skeletonized data, cluster height weighted by  $H = 2$ , cluster extent weighted by  $E = 1$ , voxel connectivity  
262 = 26). Voxel-wise analyses using TBSS and TFCE allowed for sensitive detection of regionally-specific

263 obesity-related DBSI-FF and RF effects in white matter, while stringently controlling for multiple  
264 comparisons across space. Participant age, sex, race/ethnicity, parental education, household income,  
265 parental marital status, pubertal development stage (PDS), mean head motion, and intracranial volume  
266 (ICV) were covaried in TBSS. Group differences in white matter skeleton-average values of DBSI-FF  
267 and RF were assessed with linear mixed-effects models using the *lme4* package (Bates et al., 2015),  
268 where the same set of covariates plus weight group were fixed effects and site was the random effect.

#### 269 **2.4.2. Striatum and hypothalamus**

270 DBSI-FF and RF outliers in the nucleus accumbens, caudate nucleus, putamen, and hypothalamus  
271 that were  $\pm 3$  SD away from the mean were removed (**Supplementary Table 1**). One and two-year  
272 changes in obesity-related measures (i.e., WC, BMI, and BMI  $z$ -scores) were calculated by subtracting  
273 baseline from respective follow-up. Extreme BMI values ( $< 10$  kg/m<sup>2</sup> or  $> 50$  kg/m<sup>2</sup>) and associated BMI  
274  $z$ -scores were removed, including 1 NW and 1 OB at one-year and 1 OW at two-year. Distributions for  
275 obesity-related measures at and changes between all timepoints are shown in **Supplementary Fig. 3**.

276 Associations between DBSI metrics and baseline or future change in obesity-related measures  
277 were assessed using linear mixed-effects models. Age (at baseline, one, or two-year), sex, race/ethnicity,  
278 PDS (at baseline, one, or two-year), parental education, household income, parental marital status, mean  
279 head motion, and ICV were covaried due to potential confounding (Lawrence et al., 2022; Li et al., 2023;  
280 Palmer et al., 2022; Rapuano et al., 2020), and the random effect was family nested within sites. In  
281 longitudinal models, baseline obesity-related measures were also covaried. As we had *a priori*  
282 hypotheses, and the goal was to describe regionally-specific relations between tissue microstructure and  
283 convergent obesity-related measures, multiple comparisons were corrected with each structure treated as a  
284 family, at two-tailed  $p = 0.05 / (4 \text{ regions} \times 2 \text{ DBSI metrics}) = 0.00625$ . Effect size estimates were  
285 standardized  $\beta$ 's with 95% confidence intervals (CIs) and partial  $R^2$ 's. Models were checked for normality  
286 of residuals, homoscedasticity, and low multicollinearity (variance inflation factors were  $\leq 2.56$ ). As there  
287 were missing data following outlier removal, sample sizes varied and are reported in individual analyses.

### 288 **2.4.3. Comparison between DBSI and RSI**

289 Mean RSI restricted normalized isotropic (RSI-RNI) metrics in bilateral nucleus accumbens,  
290 caudate nucleus, and putamen were obtained from the ABCD Study<sup>®</sup> tabulated dataset (Hagler et al.,  
291 2019). The ABCD Study<sup>®</sup> segmented structures using FreeSurfer v5.3; the hypothalamus was not  
292 specifically segmented and voxel-wise RSI-RNI maps were not available. RSI reflects cellularity as an  
293 increase in the restricted isotropic (originating from intracellular water) diffusion signal, i.e., RSI-RNI  
294 (Rapuano et al., 2020, 2022). Associations between RSI-RNI and baseline or future change in obesity-  
295 related measures were evaluated using linear mixed-effects models, as in DBSI described in **section 2.4.2**.  
296 To further compare model performance, DBSI-RF and RSI-RNI from the nucleus accumbens, caudate  
297 nucleus, and putamen were each tested on classifying NW and OB participants using mixed-effects  
298 logistic regression, with the same fixed and random effect covariates in linear models. Receiver operating  
299 characteristic curves and areas-under-the-curve (AUCs) with 95% CIs were computed using the *pROC*  
300 package, and AUCs from DBSI-RF and RSI-RNI were compared using DeLong's test (Robin et al.,  
301 2011).

302

## 303 **3. Results**

### 304 **3.1. Sample characteristics**

305 Participant demographics, neuroimaging metrics, and obesity-related measures are described in  
306 **Table 1**. Qualitatively, the OW and/or OB groups compared to the NW group had more non-White  
307 participants, more advanced pubertal development, lower parental education, household income, and  
308 proportion of married parents, higher baseline obesity-related measures, and greater one and two-year  
309 gain in WC but decrease in BMI *z*-scores. Groups did not differ significantly in striatal or hypothalamic  
310 volumes; these volumes were thus not covaried in addition to ICV in analyses.

| Variable                                              | Group (total n = 601) |                    |                    | p-value     |
|-------------------------------------------------------|-----------------------|--------------------|--------------------|-------------|
|                                                       | NW                    | OW                 | OB                 |             |
| <b>n</b>                                              | 212 (35.3% of all)    | 187 (31.1% of all) | 202 (33.6% of all) | N/A         |
| <b>Age (months)</b>                                   | 121 ± 8               | 121 ± 7            | 120 ± 7            | 0.89        |
| <b>Sex</b>                                            |                       |                    |                    |             |
| Male                                                  | 113 (53.3%)           | 98 (52.4%)         | 120 (59.4%)        | 0.31        |
| Female                                                | 99 (46.7%)            | 89 (47.6%)         | 82 (40.6%)         |             |
| <b>Race/ethnicity</b>                                 |                       |                    |                    |             |
| Asian                                                 | 1 (0.5%)              | 1 (0.5%)           | 4 (2.0%)           | < 0.001 *** |
| Black                                                 | 16 (7.5%)             | 23 (12.3%)         | 27 (13.4%)         |             |
| Hispanic                                              | 25 (11.8%)            | 37 (19.8%)         | 54 (26.7%)         |             |
| White                                                 | 156 (73.6%)           | 112 (59.9%)        | 99 (49.0%)         |             |
| Other                                                 | 14 (6.6%)             | 14 (7.5%)          | 18 (8.9%)          |             |
| <b>PDS category</b>                                   |                       |                    |                    |             |
| 1                                                     | 129 (60.8%)           | 76 (40.6%)         | 86 (42.6%)         | < 0.001 *** |
| 2                                                     | 53 (25.0%)            | 49 (26.2%)         | 51 (25.2%)         |             |
| 3+                                                    | 30 (14.2%)            | 62 (33.2%)         | 65 (32.2%)         |             |
| <b>Parental education</b>                             |                       |                    |                    |             |
| No HS diploma                                         | 0 (0%)                | 1 (0.5%)           | 4 (2.0%)           | < 0.001 **  |
| HS diploma/ GED                                       | 7 (3.3%)              | 5 (2.7%)           | 20 (9.9%)          |             |
| Some college                                          | 14 (6.6%)             | 28 (15.0%)         | 42 (20.8%)         |             |
| Bachelor                                              | 97 (45.8%)            | 87 (46.5%)         | 84 (41.6%)         |             |
| Postgraduate                                          | 94 (44.3%)            | 66 (35.3%)         | 52 (25.7%)         |             |
| <b>Household income</b>                               |                       |                    |                    |             |
| < 50k                                                 | 32 (15.1%)            | 45 (24.1%)         | 62 (30.7%)         | < 0.001 *** |
| ≥ 50k & < 100k                                        | 64 (30.2%)            | 74 (39.6%)         | 74 (36.6%)         |             |
| ≥ 100k                                                | 116 (54.7%)           | 68 (36.4%)         | 66 (32.7%)         |             |
| <b>Parental marriage</b>                              |                       |                    |                    |             |
| Married                                               | 164 (77.4%)           | 128 (68.4%)        | 127 (62.9%)        | 0.005 **    |
| Not married                                           | 48 (22.6%)            | 59 (31.6%)         | 75 (37.1%)         |             |
| <b>Mean motion (mm)</b>                               | 1.23 ± 0.25           | 1.27 ± 0.31        | 1.27 ± 0.30        | 0.25        |
| <b>ICV (mm<sup>3</sup>)</b>                           | 1539012 ± 128794      | 1569834 ± 151931   | 1559140 ± 144992   | 0.09        |
| <b>V<sub>hypothalamus</sub> (mm<sup>3</sup>)</b>      | 737 ± 90              | 740 ± 104          | 733 ± 108          | 0.77        |
| <b>V<sub>nucleus accumbens</sub> (mm<sup>3</sup>)</b> | 1028 ± 204            | 1057 ± 225         | 1034 ± 204         | 0.36        |
| <b>V<sub>caudate nucleus</sub> (mm<sup>3</sup>)</b>   | 7902 ± 990            | 8038 ± 975         | 7853 ± 998         | 0.16        |
| <b>V<sub>putamen</sub> (mm<sup>3</sup>)</b>           | 10609 ± 1154          | 10691 ± 1162       | 10627 ± 1206       | 0.77        |
| <b>Obesity-related measures</b>                       |                       |                    |                    |             |
| <b>Baseline</b>                                       |                       |                    |                    |             |
| BMI (kg/m <sup>2</sup> )                              | 16.82 ± 1.39          | 20.92 ± 1.06       | 25.85 ± 3.41       | < 0.001 *** |
| BMI percentile                                        | 48.51 ± 22.38         | 90.43 ± 2.90       | 97.63 ± 1.32       | < 0.001 *** |
| BMI z-score                                           | -0.06 ± 0.65          | 1.33 ± 0.17        | 2.05 ± 0.29        | < 0.001 *** |
| WC (inch)                                             | 25.13 ± 2.27          | 29.16 ± 2.68       | 32.96 ± 4.10       | < 0.001 *** |
| <b>One-year</b>                                       |                       |                    |                    |             |
| BMI (kg/m <sup>2</sup> )                              | 17.61 ± 1.88          | 21.97 ± 2.24       | 27.16 ± 4.63       | < 0.001 *** |
| BMI z-score                                           | -0.01 ± 0.75          | 1.28 ± 0.47        | 1.98 ± 0.53        | < 0.001 *** |
| WC (in)                                               | 25.93 ± 2.68          | 30.03 ± 2.82       | 34.89 ± 4.48       | < 0.001 *** |
| <b>Change (Δ) over one year</b>                       |                       |                    |                    |             |
| ΔBMI (kg/m <sup>2</sup> )                             | 0.79 ± 1.29           | 1.05 ± 1.97        | 1.30 ± 3.57        | 0.12        |
| ΔBMI z-score                                          | 0.04 ± 0.51           | -0.05 ± 0.44       | -0.08 ± 0.45       | 0.024 *     |
| ΔWC (in)                                              | 0.80 ± 2.34           | 0.88 ± 2.66        | 1.94 ± 3.16        | < 0.001 *** |
| <b>Two-year</b>                                       |                       |                    |                    |             |
| BMI (kg/m <sup>2</sup> )                              | 18.43 ± 2.32          | 22.91 ± 2.48       | 28.11 ± 4.81       | < 0.001 *** |
| BMI z-score                                           | 0.01 ± 0.86           | 1.28 ± 0.50        | 1.94 ± 0.54        | < 0.001 *** |
| WC (in)                                               | 27.12 ± 3.01          | 31.34 ± 3.27       | 36.02 ± 4.98       | < 0.001 *** |
| <b>Change (Δ) over two years</b>                      |                       |                    |                    |             |
| ΔBMI (kg/m <sup>2</sup> )                             | 1.62 ± 1.83           | 1.98 ± 2.27        | 2.25 ± 3.85        | 0.07        |
| ΔBMI z-score                                          | 0.07 ± 0.65           | -0.05 ± 0.48       | -0.11 ± 0.48       | 0.002 **    |
| ΔWC (in)                                              | 1.99 ± 2.72           | 2.18 ± 3.01        | 3.06 ± 3.72        | 0.001 **    |

311 **Table 1. Participant demographics, brain volumes, and obesity-related measures.** Statistics are  
312 shown as mean  $\pm$  standard deviation for continuous variables and count (frequency) for categorical data.  
313 Variables were assessed at baseline unless otherwise noted. Comparisons were performed using one-way  
314 analysis of variance or chi-squared tests as appropriate. The “Other” category under race/ethnicity  
315 included participants who were parent/caregiver-identified as American Indian, Alaskan Native, Native  
316 Hawaiian, other Pacific Islander, mixed, or otherwise not listed. Abbreviations: NW, children with  
317 normal-weight; OW, with overweight; OB, with obesity; PDS, pubertal development stage; HS, high  
318 school; GED, General Educational Development; ICV, intracranial volume; V, volume; BMI, body mass  
319 index; WC, waist circumference. \*,  $p \leq 0.05$ ; \*\*,  $p \leq 0.01$ ; \*\*\*,  $p \leq 0.001$ .  
320

### 321 3.2. Comparison of white matter DBSI metrics across groups

322 TBSS ANOVAs indicated significant main effects of weight group for both DBSI-FF and RF.  
323 Follow-up TBSS *t*-tests showed that relative to NW, both OW and OB participants had significantly  
324 lower DBSI-FF (reflecting lower axonal/dendritic density) and greater DBSI-RF (reflecting elevated  
325 cellularity) in widespread white matter tracts (all FWE-corrected  $p \leq 0.05$ ). Qualitatively, group  
326 differences in both DBSI-FF and RF appeared more widespread throughout white matter tracts in the OB  
327 vs. NW comparisons than in OW vs. NW comparisons (**Fig. 1**); nonetheless, white matter voxel-wise  
328 DBSI-FF and RF were not significantly different between OB and OW groups (FWE-corrected  $p >$   
329 0.054). Consistent with voxel-wise comparisons, relative to NW, both OW and OB groups had lower  
330 white matter average DBSI-FF (OW vs. NW,  $\beta = -0.39$ , 95% CI: -0.60 to -0.18,  $p < 0.001$ ; OB vs. NW,  $\beta$   
331 = -0.33, 95% CI: -0.54 to -0.11,  $p = 0.003$ ) and greater DBSI-RF (OW vs. NW,  $\beta = 0.50$ , 95% CI: 0.30 to  
332 0.70,  $p < 0.001$ ; OB vs. NW,  $\beta = 0.36$ , 95% CI: 0.16 to 0.56,  $p < 0.001$ ), but these differences were not  
333 significant between OW and OB ( $p$ 's = 0.65 and 0.14 for DBSI-FF and RF comparisons).



## DBSI Fiber Fraction (FF)

NW > OW

NW > OB

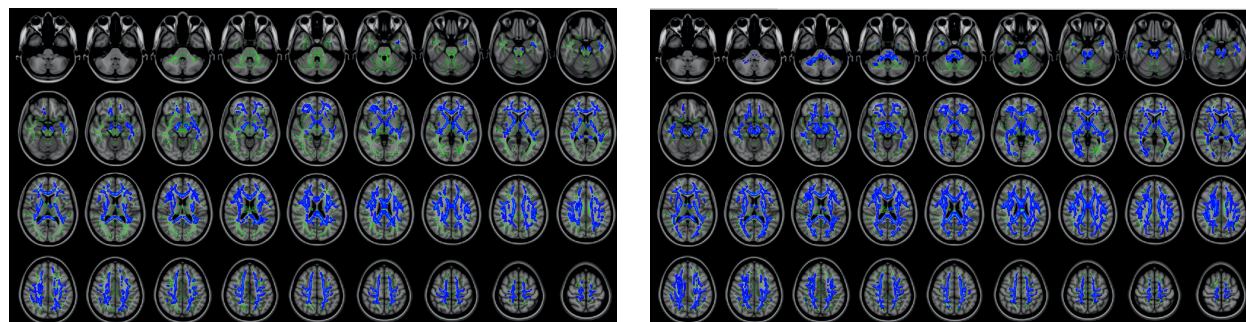

## DBSI Restricted Fraction (RF)

NW < OW

NW < OB

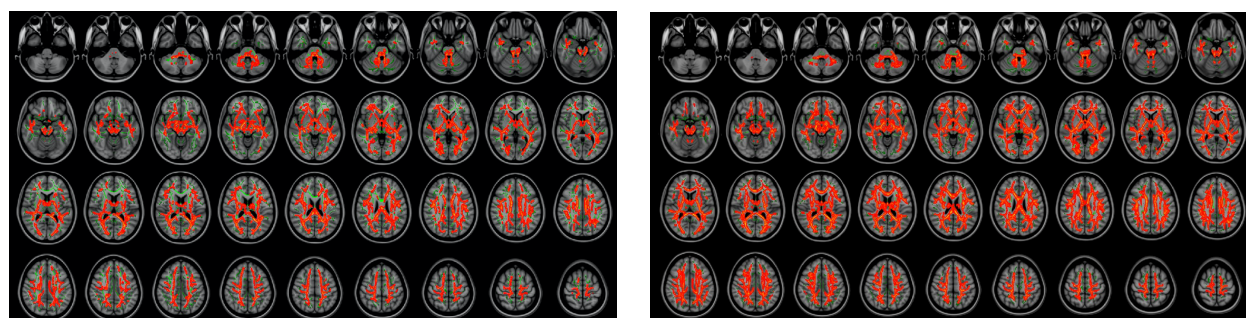

334

335 **Fig. 1.** Voxel-wise comparisons of white matter DBSI metrics amongst unrelated children with normal-  
336 weight (NW;  $n = 202$ ), overweight (OW,  $n = 180$ ) and obesity (OB;  $n = 191$ ). In each panel, axial images  
337 are shown from inferior (top left) to superior (bottom right). In *green*: white matter skeleton; in *blue, light*  
338 *blue*: NW > OB/OW at family-wise error (FWE) rate-corrected  $p \leq 0.05$  and  $0.01$ ; in *red, yellow*: NW <  
339 OB/OW at FWE-corrected  $p \leq 0.05$  and  $0.01$ . Comparisons were adjusted for age, sex, race/ethnicity,  
340 parental education, household income, parental marital status, pubertal development stage, mean head  
341 motion, and intracranial volume. DBSI, diffusion basis spectrum imaging.

342

### 343 3.3. Associations between striatal and hypothalamic DBSI metrics and obesity-related measures

#### 344 3.3.1. Baseline

345 Greater BMI at baseline was significantly associated with greater DBSI-RF in the hypothalamus  
346 ( $\beta = 0.11$ , 95% CI: 0.04 to 0.19, partial  $R^2 = 0.014$ ,  $p = 0.005$ ), nucleus accumbens ( $\beta = 0.30$ , 95% CI:  
347 0.22 to 0.39, partial  $R^2 = 0.096$ ,  $p < 0.001$ ), caudate nucleus ( $\beta = 0.18$ , 95% CI: 0.08 to 0.27, partial  $R^2 =$   
348 0.034,  $p < 0.001$ ), and the putamen ( $\beta = 0.14$ , 95% CI: 0.06 to 0.22, partial  $R^2 = 0.021$ ,  $p = 0.001$ ) (**Fig.**  
349 **2A**). These results were consistent with WC and BMI  $z$ -scores as obesity-related measures. Further,

350 greater baseline BMI  $z$ -scores were significantly related to lower DBSI-FF in the hypothalamus ( $\beta = -$   
351 0.12, 95% CI: -0.20 to -0.05, partial  $R^2 = 0.016$ ,  $p = 0.002$ ) (**Fig. 2B**). Similar associations, at nominal but  
352 not multiple comparison-adjusted significance, were seen between lower DBSI-FF in the hypothalamus  
353 and WC ( $\beta = -0.08$ ,  $p = 0.038$ ) and BMI ( $\beta = -0.09$ ,  $p = 0.024$ ); in the nucleus accumbens and WC ( $\beta = -$   
354 0.10,  $p = 0.009$ ); and in the putamen and BMI ( $\beta = -0.08$ ,  $p = 0.048$ ) and BMI  $z$ -scores ( $\beta = -0.08$ ,  $p =$   
355 0.048). Detailed statistics for all models are reported in **Supplementary Table 2**. Follow-up analyses  
356 revealed no DBSI metric by hemisphere interaction in relating to baseline obesity-related measures (i.e.,  
357 no laterality effect;  $p$ 's  $\geq 0.30$ ).

358 Beyond DBSI metrics, variables that were associated with greater obesity-related measures at  
359 baseline included older age, lower parental education, and more advanced pubertal stage. As we did not  
360 specifically power or hypothesize for demographics-related effects, these findings are exploratory and are  
361 noted in **Supplementary Table 3**. In total, our linear-mixed effects models explained 18-25% of the  
362 variance in baseline obesity-related measures.



### A. Associations with DBSI restricted fraction (RF)

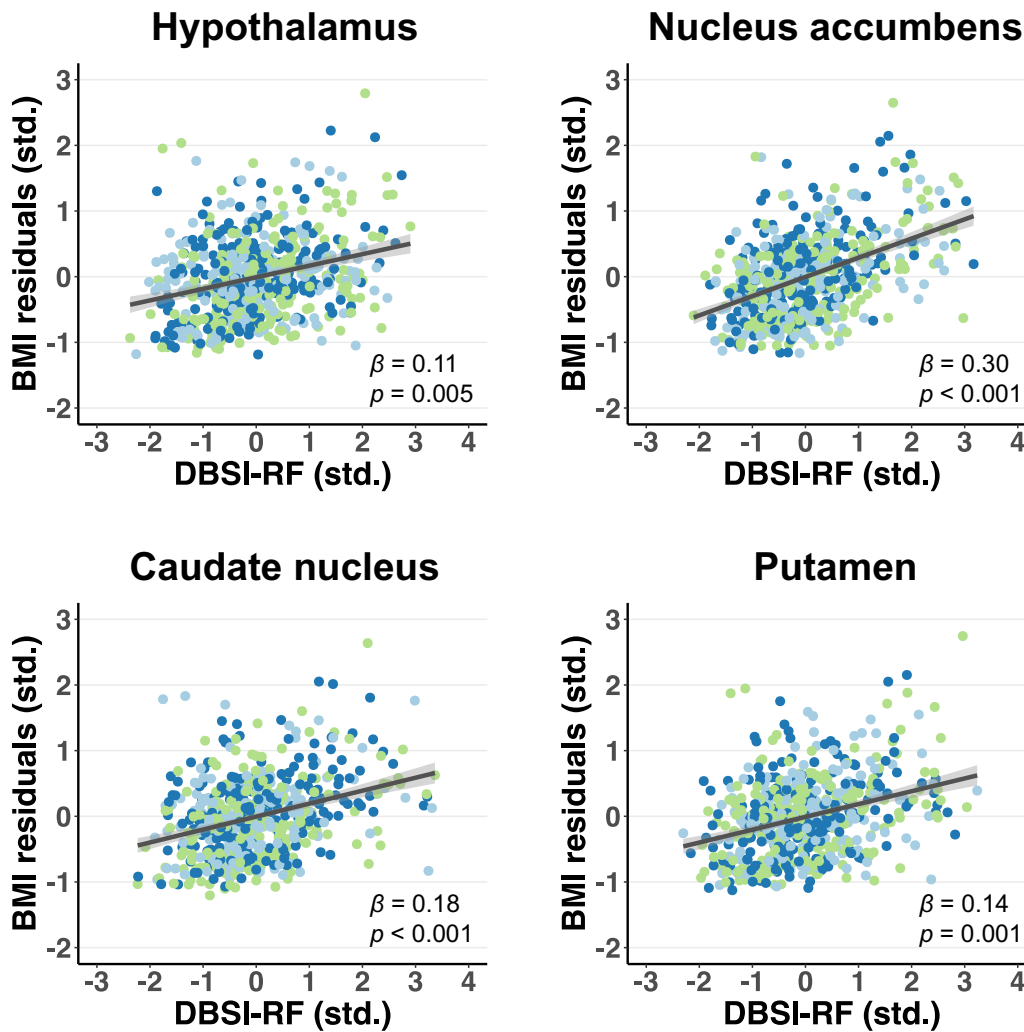

### B. Associations with DBSI fiber fraction (FF)

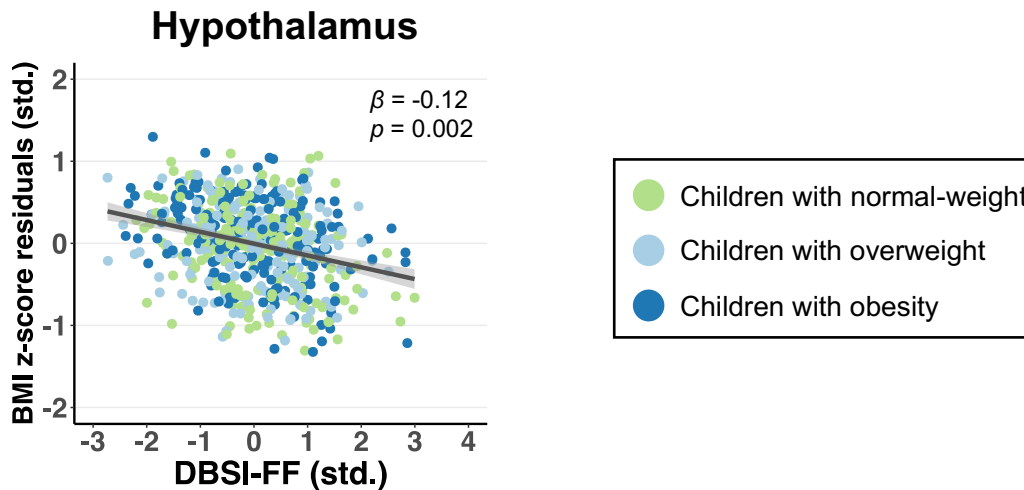

364 **Fig. 2.** Significant associations **(A)** between baseline body mass index (BMI) and DBSI-RF in the  
365 hypothalamus and striatum and **(B)** between baseline BMI *z*-scores and DBSI-FF in the hypothalamus in  
366 children. BMI or BMI *z*-score residuals (adjusted for age, sex, race/ethnicity, parental education,  
367 household income, parental marital status, pubertal development stage, mean head motion, intracranial  
368 volume, and family nested by site) and DBSI metrics were standardized (std.). Standardized  $\beta$  regression  
369 coefficients were reported with 95% confidence intervals (shaded). DBSI, diffusion basis spectrum  
370 imaging.

371

### 372 **3.3.2. One and two-year change**

373 Greater DBSI-RF in the hypothalamus at baseline, at nominal significance not surviving multiple  
374 comparison correction, predicted greater gain in WC over two years, accounting for baseline WC ( $\beta =$   
375 0.09, 95% CI: 0.01 to 0.18, partial  $R^2 = 0.008$ ,  $p = 0.035$ ; **Supplementary Fig. 4**). However, such effect  
376 was not seen at one-year follow-up, or with changes in BMI or BMI *z*-scores as obesity-related measures  
377 ( $p$ 's = 0.79 and 0.52). Other one or two-year changes in obesity-related measures were not associated with  
378 baseline DBSI metrics (**Supplementary Tables 4 and 5**).

### 379 **3.4. Associations between striatal RSI-RNI and obesity-related measures**

#### 380 **3.4.1. Baseline**

381 Consistent with a previous study using ABCD Study<sup>®</sup> baseline data ( $n = 5,366$ ; Rapuano et al.,  
382 2020), greater baseline BMI was associated with higher RSI-RNI in the nucleus accumbens ( $\beta = 0.36$ ,  
383 95% CI: 0.27 to 0.44, partial  $R^2 = 0.125$ ,  $p < 0.001$ ), caudate nucleus ( $\beta = 0.15$ , 95% CI: 0.07 to 0.23,  
384 partial  $R^2 = 0.025$ ,  $p < 0.001$ ), and putamen ( $\beta = 0.17$ , 95% CI: 0.09 to 0.26, partial  $R^2 = 0.030$ ,  $p < 0.001$ )  
385 in the current, smaller sample. Results were similar with WC and BMI *z*-scores. Detailed statistics for all  
386 linear mixed-effects models are reported in **Supplementary Table 6**.

#### 387 **3.4.2. One and two-year change**

388 Greater baseline RSI-RNI in the nucleus accumbens and caudate nucleus were respectively  
389 associated, not surviving multiple comparison correction, with one-year gain in WC, accounting for  
390 baseline levels (nucleus accumbens:  $\beta = 0.10$ , 95% CI: 0.00 to 0.20, partial  $R^2 = 0.008$ ,  $p = 0.042$ ; caudate  
391 nucleus:  $\beta = 0.11$ , 95% CI: 0.02 to 0.19, partial  $R^2 = 0.011$ ,  $p = 0.017$ ; **Supplementary Fig. 5**). These

392 associations were not seen at two-year follow-up or with changes in BMI or BMI z-scores  
393 (Supplementary Tables 7 and 8).

### 394 3.5. Comparison between DBSI and RSI on classifying NW and OB groups

395 Striatal DBSI and RSI metrics reflective of neuroinflammation-associated cellularity and cellular  
396 density, i.e., DBSI-RF and RSI-RNI, showed similar sensitivity and specificity in classifying NW and OB  
397 children ( $p$ 's  $\geq 0.13$ ; Fig. 3). Across the striatum, DBSI-RF was positively and strongly correlated with  
398 RSI-RNI ( $r$ 's  $\geq 0.60$ ,  $p$ 's  $\leq 0.001$ ; Supplementary Fig. 6).

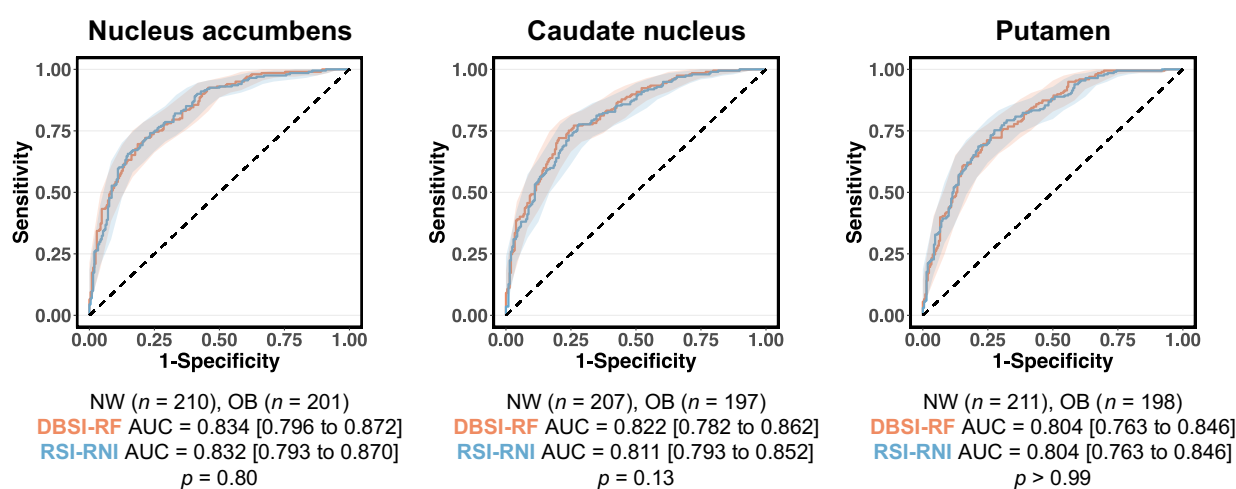

399 **Fig. 3.** Receiver operating characteristic curves comparing striatal DBSI restricted fraction (RF) and RSI  
400 restricted normalized isotropic (RNI) performance in classifying children with normal-weight (NW) and  
401 obesity (OB). AUC, area-under-the-curve; DBSI, diffusion basis spectrum imaging; RSI, restriction  
402 spectrum imaging.  
403

## 404 4. Discussion

### 405 4.1. Overview

406 Here we present both novel findings and support for the reproducibility of previous neuroimaging  
407 studies that observed microstructural alterations suggestive of neuroinflammation in key feeding and  
408 reward-related brain regions in childhood obesity. First, we demonstrate that elevated DBSI-assessed  
409 cellularity, i.e., putative inflammatory marker, in the striatum relates to higher WC, BMI, and BMI z-  
410 scores in 601 children aged 9 to 11 years from the ABCD Study<sup>®</sup>, reproducing observations made by  
411 Rapuano et al., (2020) that used another diffusion-based RSI model in the same dataset. Quantitatively,  
412

413 DBSI-RF and RSI-RNI were associated with obesity-related measures in similar magnitudes, and the two  
414 methods exhibited comparable performance in classifying NW vs. OB children. Such convergence of  
415 findings underpins the sensitivity and utility of diffusion MRI-based techniques in characterizing brain  
416 microstructural alterations in obesity.

417         Second, we observed associations between obesity and increased purported cellularity consistent  
418 with neuroinflammation in brain white matter tracts and hypothalamus, which were not assessed by  
419 Rapuano et al., (2020). Our results in the hypothalamus align with reports of putative gliosis in this  
420 region, assessed by quantitative T2 MRI, in both childhood and adult obesity (Schur et al., 2015;  
421 Sewaybricker et al., 2019; Sewaybricker, Kee, et al., 2021; Sewaybricker, Melhorn, et al., 2021; Thaler et  
422 al., 2012). Here, our findings add diffusion MRI-derived evidence of obesity-related putative  
423 neuroinflammation in the hypothalamus in children. Furthermore, to our knowledge, our study is the first  
424 to investigate and report overweight and obesity-associated white matter microstructural alterations in  
425 children, in line with our earlier studies of DBSI-assessed putative white matter neuroinflammation in  
426 adults (Samara et al., 2020). Collectively, our findings and those previously reported suggest that young  
427 children manifest obesity-related differences in brain microstructure that are consistent with  
428 neuroinflammation seen in animal and post-mortem human brain studies (Baufeld et al., 2016; Buckman  
429 et al., 2013; De Souza et al., 2005; Décarie-Spain et al., 2018; Schur et al., 2015; Valdearcos et al., 2017).  
430 Such brain differences may affect current and future susceptibility for weight gain and its comorbidities  
431 including cognitive impairment, type 2 diabetes, and late-life dementia (Liang et al., 2015; Simmonds et  
432 al., 2016; Tait et al., 2022).

#### 433 **4.2. Links between obesity, neuroinflammation, and brain function**

434         The highly vascularized hypothalamus responds to feeding-related hormones, neuronal signals,  
435 and nutrients derived from the bloodstream (Velloso & Schwartz, 2011). As a “metabolic sensor”, the  
436 hypothalamus is vulnerable to overfeeding and obesity-related elevations in peripheral pro-inflammatory  
437 molecules including cytokines and saturated fatty acids (Jais & Brüning, 2017). Overfeeding also causes  
438 the blood-brain barrier to break down, further enabling inflammatory factors to infiltrate brain tissue

439 (Guillemot-Legris et al., 2016; Guillemot-Legris & Muccioli, 2017; Stranahan et al., 2016). Our finding  
440 that DBSI-assessed cellularity (DBSI-RF) in the hypothalamus is greater in childhood obesity is  
441 consistent with the neuroinflammatory phenotype encompassing the recruitment, proliferation, and  
442 activation of astrocytes and microglia (i.e., reactive gliosis) seen in this brain region in rodents fed with  
443 high-fat diets (Buckman et al., 2013; De Souza et al., 2005). While such immune response may initially  
444 be neuroprotective, chronic gliosis leads to dysregulated neuroinflammatory processes that disrupt  
445 hypothalamic metabolic regulation and contribute to overfeeding, leptin and insulin-resistance, and  
446 development of obesity (Gómez-Apo et al., 2021; Sochocka et al., 2017; Valdearcos et al., 2017).  
447 Persistent neuroinflammation could also cause axonal damage and loss (Frischer et al., 2009; Kempuraj et  
448 al., 2016), which may explain our observed association between obesity and lower DBSI-assessed  
449 axonal/dendritic density (DBSI-FF).

450         The striatum plays a key role in reward processing and appetitive behavior (Stice et al., 2011).  
451 Striatal activity, primarily dopamine neurotransmission, is influenced by homeostatic signals from the  
452 hypothalamus and by circulating feeding-related hormones, both acting on receptors on midbrain  
453 dopaminergic cells (Abizaid et al., 2006; Figlewicz, 2016; Hommel et al., 2006; King et al., 2011).  
454 Altered dopamine neurotransmission has been noted in obesity (Geiger et al., 2009; Wang et al., 2001;  
455 Wu et al., 2017). Beyond the hypothalamus, neuroinflammation in the striatum may further contribute to  
456 obesogenic behavior. Indeed, our observation of heightened DBSI-assessed cellularity across the striatum  
457 in childhood obesity matches the microstructural changes characteristic of diet-induced reactive gliosis in  
458 the nucleus accumbens in rodents (Décarie-Spain et al., 2018; Molina et al., 2020). Taken together, MRI-  
459 based assessments of hypothalamic and striatal microstructure by us and others consistently suggest  
460 putative neuroinflammation in these regions in childhood obesity, in agreement with studies in rodent  
461 models and human adults.

462         Longitudinally, greater DBSI-assessed cellularity in the hypothalamus weakly predicted two-year  
463 gain in WC, aligning with a recent T2 MRI-based report of putative hypothalamic gliosis being associated  
464 with weight gain in children (Sewaybricker, Kee, et al., 2021). Further, greater RSI-RNI in the nucleus

465 accumbens and caudate nucleus were linked to one-year WC gain, reproducing findings in Rapuano et al.,  
466 (2020). However, these findings were at nominal but not multiple comparison-corrected significance, and  
467 did not generalize across different obesity-related measures or MRI techniques. As our sample size was  
468 not intended to power for the weaker longitudinal effects observed in Rapuano et al., (2020), these  
469 findings require confirmation in larger studies involving more longitudinal observations as the ABCD  
470 Study<sup>®</sup> continues to release data. Nonetheless, given evidence that striatal neuroinflammation causally  
471 contribute to overfeeding in rodents (Décarie-Spain et al., 2018), plus emerging reports that putative  
472 nucleus accumbens cellularity may mediate the relationships between eating behavior and obesity in both  
473 adults and children (Rapuano et al., 2022; Samara et al., 2021), chronic neuroinflammation should be  
474 evaluated as a potential contributing factor to obesity maintenance.

#### 475 **4.3. Brain microstructure in childhood vs. adult obesity**

476 Overall, the pattern of our results in children agrees with DBSI-assessed microstructural  
477 alterations seen in adult obesity (Ly et al., 2021; Samara et al., 2020, 2021). Obesity-associated decrease  
478 in apparent axonal/dendritic density and increase in cellularity have been observed in white matter in both  
479 adults and children. However, the pattern of results in the striatum differs by age. For example, greater  
480 putative cellularity in the nucleus accumbens is associated with higher BMI and related metrics in  
481 children, but such effect is absent in adults (Samara et al., 2021). Interestingly, it has been noted that in  
482 adults, higher BMI is associated with smaller nucleus accumbens volumes (Dekkers et al., 2019; García-  
483 García et al., 2020), whereas in children, such association is reversed (García-García et al., 2020;  
484 Rapuano et al., 2017) or absent, as is in the current study and another analysis of the ABCD Study<sup>®</sup> data  
485 (Adise et al., 2021). It is possible that as early reactive responses to obesity, striatal cellularity and gliosis  
486 would manifest as microstructural but not volumetric alterations in children, while chronic  
487 neuroinflammation would over time contribute to vasogenic edema and atrophy seen in adults (Dorrance  
488 et al., 2014; Sochocka et al., 2017), as in multiple sclerosis (Kamholz & Garbern, 2005). Furthermore, as  
489 executive control regions such as the prefrontal cortex mature later relative to the striatum (Spear, 2000),  
490 striatal disruptions may lead to a more dysregulated reward system that influences obesogenic behavior

491 more strongly in children than in adults. As the ABCD Study<sup>®</sup> collects biennial neuroimaging scans in the  
492 same participants from childhood through adulthood using harmonized MRI sequences, future research  
493 should capitalize on this longitudinal dataset to delineate obesity-related brain microstructural changes  
494 over development.

#### 495 **4.4. Comparison between DBSI and RSI findings**

496 Although DBSI and RSI differ in their modeling of brain microstructure, their measures of  
497 restricted water diffusion have been interpreted similarly such that the isotropic intracellular water  
498 fraction (DBSI-RF and RSI-RNI) is thought to ultimately reflect the degree of neuroinflammation-related  
499 immune cell infiltration or tissue cellularity (Cross & Song, 2017; Rapuano et al., 2020, 2022; Wang et  
500 al., 2011, 2015). Indeed, in our study, DBSI and RSI-assessed striatal cellularity related similarly to  
501 obesity-related measures and strongly with each other, and classified obesity status with comparable  
502 performance. A true head-to-head comparison of the microstructural properties reflected by DBSI-RF and  
503 RSI-RNI would however warrant a controlled phantom or immunohistological gold standard. In general,  
504 the agreeing findings from DBSI and RSI highlight that diffusion MRI-based techniques are sensitive to  
505 characterizing obesity-associated microstructural alterations in children, adding a novel neuroimaging  
506 tool that assesses putative neuroinflammation *in vivo*.

#### 507 **4.5. Limitations**

508 Limitations and future directions include, first, the lack of longitudinal timepoints besides one  
509 and two-year follow-ups. It is possible that obesity-related neuroinflammation affects clinical and  
510 behavioral outcomes on a timescale larger than two years. Second, as the ABCD Study<sup>®</sup> does not record  
511 obesity duration, we could not assess when and to what extent brain microstructural changes occur  
512 relative to obesity onset. Further research tracking children moving from normal-weight to obesity would  
513 be useful. Third, as we focused on assessing associations between brain microstructure and obesity-  
514 related measures, factors such as sex and socioeconomic status (SES) that likely impact child  
515 development and complicate said associations, though controlled for in analyses, were not tested. In terms  
516 of sex, girls have greater fat mass and more concentrated trunk adiposity than boys, even at similar BMIs



517 (Wisniewski & Chernausek, 2009). Further, though obesity is associated with elevated serum leptin levels  
518 in both sexes, such effect is stronger in girls, who also demonstrate increases in leptin during puberty as  
519 opposed to decreases in boys (Falorni et al., 1997). In terms of SES, socioeconomic adversity is a known  
520 risk factor for childhood obesity (Hemmingsson, 2018; Vazquez & Cubbin, 2020), with physical  
521 inactivity, unhealthy diet, and stress as proposed mediating mechanisms (Caprio et al., 2008;  
522 Gebremariam et al., 2017; Hemmingsson, 2018; Mekonnen et al., 2020). Studies have also noted that girls  
523 from disadvantaged neighborhoods are more susceptible to obesity compared to boys (Kranjac et al.,  
524 2021), and that girls and boys experience differential dietary influences and weight expectations from  
525 parents and peers (Caprio et al., 2008; Shah et al., 2020). Regarding brain microstructure, recent analyses  
526 using the ABCD Study<sup>®</sup> data have shown that girls demonstrate greater RSI-assessed cell and neurite  
527 density in white matter compared to boys (Lawrence et al., 2022), and lower SES interacts with greater  
528 BMI in relating to putative white matter neuroinflammation and smaller brain volumes (Adise et al.,  
529 2022; Dennis et al., 2022; Li et al., 2023). Collectively, these results suggest that there exist complex  
530 associations between sex, sociocultural forces, and brain microstructure, and future research should adopt  
531 an integrative framework to investigate how they may individually and interactively shape obesity  
532 development. On a related note, we emphasize growing concerns that current practices of MRI acquisition  
533 and quality control may inadvertently exclude participants in less accessible rural areas, from lower SES  
534 families, and of racial/ethnic minorities (Ricard et al., 2023). The exclusion of neuroimaging data with  
535 excessive head motion, in particular, poses a challenge in obesity research, as greater BMI is causally and  
536 genetically linked to increased motion (Beyer et al., 2020). It is possible that our findings may not  
537 generalize to children of all sociodemographic backgrounds, and confirmation in large samples of  
538 marginalized populations is needed.

539 Finally, we note the limited interpretability of diffusion MRI-derived microstructural metrics.  
540 While DBSI assessments have been histopathologically validated as neuroinflammation-sensitive in  
541 inflammatory neurological diseases including human and rodent models of multiple sclerosis (Chiang et  
542 al., 2014; Wang et al., 2011, 2015), and rodent optic neuritis (Lin et al., 2017; Yang et al., 2021),



543 validation remains ongoing for obesity. Although the cellularity and axonal density effects inferred from  
544 DBSI-modeled water diffusivity agree with the neuroinflammatory phenotype seen in animal models and  
545 human post-mortem brain of obesity (Baufeld et al., 2016; Buckman et al., 2013; De Souza et al., 2005;  
546 Décarie-Spain et al., 2018; Schur et al., 2015; Valdearcos et al., 2017), we recognize that DBSI, as any  
547 MRI technique, is an indirect marker of brain microstructure and could reflect neural development that  
548 otherwise do not involve neuroinflammation (Palmer et al., 2022). On a related note, it is challenging to  
549 determine whether feeding-related regions such as the hypothalamus and striatum are the only ones  
550 involved in obesity-related neuroinflammation, since a true control region in which this phenomenon is  
551 definitively absent has not been identified. Such limitation invites future research to evaluate  
552 microstructure throughout gray matter as well as study potential interactions between gray and white  
553 matter alterations in obesity. The confidence in the validity of MRI-based assessments of obesity-related  
554 neuroinflammation could be explored with rodent models and/or human studies using positron emission  
555 tomography methods for measuring neuroinflammatory indicators (e.g., astrocyte and microglia  
556 activation).

## 557 **5. Conclusions**

558 With DBSI, we observed microstructural alterations in white matter, hypothalamus, and striatum  
559 in children with overweight and obesity. Agreement between DBSI and RSI suggested that diffusion MRI  
560 is a sensitive and useful tool for assessing obesity-related putative cellularity in children. Given that  
561 childhood and adolescence involve substantial brain development, further longitudinal work is warranted  
562 to elucidate how early changes in brain microstructure may contribute to obesity and its comorbidities in  
563 the long run.

564 **Funding:** This work was supported by the National Institutes of Health (NIH) grants R01DK085575  
565 (Hershey), T32DA007261-29 (Samara, Ray, Eisenstein), 1RF1AG072637-01 (Raji), KL2TR000450 in  
566 partial form of Washington University Institute of Clinical and Translational Sciences Multidisciplinary  
567 Clinical Research Career Development Program to (Ray, Raji), P30DK020579 in partial form of  
568 Washington University Diabetes Research Center Pilot & Feasibility Award to (Eisenstein); the  
569 Washington University Neuroimaging Laboratory Research Center Innovation Funds (Eisenstein), the  
570 Radiological Society of North America Research Scholar Grant (Raji), the Mallinckrodt Institute of  
571 Radiology Pilot Award (Eisenstein) and Summer Research Program (Li), the Society for Neuroscience  
572 Trainee Professional Development Award (Li), the Washington University Summer Undergraduate  
573 Research Award (Li), and Washington University McDonnell Center for Systems Neuroscience. The  
574 ABCD Study<sup>®</sup> is supported by the NIH and federal partners (grants U01DA041048, U01DA050989,  
575 U01DA051016, U01DA041022, U01DA051018, U01DA051037, U01DA050987, U01DA041174,  
576 U01DA041106, U01DA041117, U01DA041028, U01DA041134, U01DA050988, U01DA051039,  
577 U01DA041156, U01DA041025, U01DA041120, U01DA051038, U01DA041148, U01DA041093,  
578 U01DA041089, U24DA041123, and U24DA041147). A full list of supporters is available  
579 at <https://abcdstudy.org/federal-partners.html>. The funders had no role in study design, data collection and  
580 analysis, preparation of the manuscript, or decision to publish. The content is solely the responsibility of  
581 the authors and does not necessarily represent the official views of the National Institutes of Health or  
582 other funders.

583  
584 **Conflict of interest disclosures:** Unrelated to this study, Dr. Cyrus A. Raji consults to Brainreader,  
585 Neurevolution, Voxelwise, and the Pacific Neuroscience Foundation. Other authors have no conflict of  
586 interest to disclose.

587  
588 **Author contributions (CRediT):** **Zhaolong Li, BA:** Conceptualization, Data curation, Formal analysis,  
589 Methodology, Software, Visualization, Writing – original draft, Writing – review & editing; **Amjad**  
590 **Samara, MD:** Conceptualization, Data curation, Formal analysis, Software, Writing – Review & Editing;  
591 **Mary Katherine Ray, PhD:** Conceptualization, Formal analysis, Writing – original draft, Writing –  
592 Review & Editing; **Jerrel Rutlin, BS:** Data curation, Software; **Cyrus A. Raji, MD, PhD:** Writing –  
593 review & editing; **Joshua S. Shimony, MD, PhD:** Writing – review & editing; **Peng Sun, PhD:**  
594 Methodology, Writing – review & editing; **Sheng-Kwei Song, PhD:** Methodology, Writing – review &  
595 editing; **Tamara Hershey, PhD:** Conceptualization, Methodology, Supervision, Writing – review &  
596 editing; **Sarah A. Eisenstein, PhD:** Conceptualization, Formal analysis, Methodology, Software,  
597 Supervision, Validation, Writing – original draft, Writing – review & editing

598  
599 **Acknowledgements:** The authors wish to thank Richard Ni, Jonathan Koller, and Heather Lugar for their  
600 assistance with neuroimaging analyses in this study.

601  
602 **Data availability statement:** The ABCD Study<sup>®</sup> data are publicly available through the National  
603 Institute of Mental Health Data Archive (<https://nda.nih.gov/abcd>). The ABCD Study<sup>®</sup> data used in this  
604 report came from the ABCD Study<sup>®</sup> Data Release 2.0.1 (DOI: DOI 10.15154/1506087, July 2019) and  
605 4.0 (DOI: 10.15154/1523041, October 2021). The p-code of script used to generate DBSI maps in this  
606 study are available upon request, and the developers of DBSI are in the process of publishing an open-  
607 source version of the scripts.

608 **References**

- 609 Abizaid, A., Liu, Z.-W., Andrews, Z. B., Shanabrough, M., Borok, E., Elsworth, J. D., Roth, R. H.,  
610 Sleeman, M. W., Picciotto, M. R., Tschöp, M. H., Gao, X.-B., & Horvath, T. L. (2006). Ghrelin  
611 modulates the activity and synaptic input organization of midbrain dopamine neurons while  
612 promoting appetite. *The Journal of Clinical Investigation*, *116*(12), 3229–3239.  
613 <https://doi.org/10.1172/JCI29867>
- 614 Adise, S., Allgaier, N., Laurent, J., Hahn, S., Chaarani, B., Owens, M., Yuan, D., Nyugen, P., Mackey, S.,  
615 Potter, A., & Garavan, H. P. (2021). Multimodal brain predictors of current weight and weight gain  
616 in children enrolled in the ABCD study ®. *Developmental Cognitive Neuroscience*, *49*, 100948.  
617 <https://doi.org/10.1016/j.dcn.2021.100948>
- 618 Adise, S., Marshall, A. T., Kan, E., Gonzalez, M. R., & Sowell, E. R. (2022). Relating neighborhood  
619 deprivation to childhood obesity in the ABCD study: Evidence for theories of neuroinflammation  
620 and neuronal stress. *Health Psychology : Official Journal of the Division of Health Psychology,*  
621 *American Psychological Association.* <https://doi.org/10.1037/hea0001250>
- 622 Barch, D. M., Albaugh, M. D., Avenevoli, S., Chang, L., Clark, D. B., Glantz, M. D., Hudziak, J. J.,  
623 Jernigan, T. L., Tapert, S. F., Yurgelun-Todd, D., Alia-Klein, N., Potter, A. S., Paulus, M. P.,  
624 Prouty, D., Zucker, R. A., & Sher, K. J. (2018). Demographic, physical and mental health  
625 assessments in the adolescent brain and cognitive development study: Rationale and description.  
626 *Developmental Cognitive Neuroscience*, *32*, 55–66.  
627 <https://doi.org/https://doi.org/10.1016/j.dcn.2017.10.010>
- 628 Bates, D., Mächler, M., Bolker, B., & Walker, S. (2015). Fitting Linear Mixed-Effects Models Using  
629 lme4. *Journal of Statistical Software; Vol 1, Issue 1 (2015)* . <https://www.jstatsoft.org/v067/i01>
- 630 Baufeld, C., Osterloh, A., Prokop, S., Miller, K. R., & Heppner, F. L. (2016). High-fat diet-induced brain  
631 region-specific phenotypic spectrum of CNS resident microglia. *Acta Neuropathologica*, *132*(3),  
632 361–375. <https://doi.org/10.1007/s00401-016-1595-4>
- 633 Beilharz, J. E., Maniam, J., & Morris, M. J. (2016). Short-term exposure to a diet high in fat and sugar, or  
634 liquid sugar, selectively impairs hippocampal-dependent memory, with differential impacts on  
635 inflammation. *Behavioural Brain Research*, *306*, 1–7.  
636 <https://doi.org/https://doi.org/10.1016/j.bbr.2016.03.018>
- 637 Beyer, F., Prehn, K., Wüsten, K. A., Villringer, A., Ordemann, J., Flöel, A., & Witte, A. V. (2020).  
638 Weight loss reduces head motion: Revisiting a major confound in neuroimaging. *Human Brain*  
639 *Mapping*, *41*(9), 2490–2494. <https://doi.org/10.1002/hbm.24959>
- 640 Biener, A. I., Cawley, J., & Meyerhoefer, C. (2020). The medical care costs of obesity and severe obesity  
641 in youth: An instrumental variables approach. *Health Economics*, *29*(5), 624–639.  
642 <https://doi.org/https://doi.org/10.1002/hec.4007>
- 643 Billot, B., Bocchetta, M., Todd, E., Dalca, A. V., Rohrer, J. D., & Iglesias, J. E. (2020). Automated  
644 segmentation of the hypothalamus and associated subunits in brain MRI. *NeuroImage*, *223*, 117287.  
645 <https://doi.org/10.1016/j.neuroimage.2020.117287>
- 646 Birdsill, A. C., Oleson, S., Kaur, S., Pasha, E., Ireton, A., Tanaka, H., & Haley, A. (2017). Abdominal  
647 obesity and white matter microstructure in midlife. *Human Brain Mapping*, *38*(7), 3337–3344.  
648 <https://doi.org/10.1002/hbm.23576>
- 649 Buckman, L. B., Thompson, M. M., Moreno, H. N., & Ellacott, K. L. J. (2013). Regional astrogliosis in  
650 the mouse hypothalamus in response to obesity. *Journal of Comparative Neurology*, *521*(6), 1322–

- 651 1333. <https://doi.org/https://doi.org/10.1002/cne.23233>
- 652 Caprio, S., Daniels, S. R., Drewnowski, A., Kaufman, F. R., Palinkas, L. A., Rosenbloom, A. L., &  
653 Schwimmer, J. B. (2008). Influence of race, ethnicity, and culture on childhood obesity:  
654 implications for prevention and treatment: a consensus statement of Shaping America's Health and  
655 the Obesity Society. *Diabetes Care*, *31*(11), 2211–2221. <https://doi.org/10.2337/dc08-9024>
- 656 Carbine, K. A., Duraccio, K. M., Hedges-Muncy, A., Barnett, K. A., Kirwan, C. B., & Jensen, C. D.  
657 (2020). White matter integrity disparities between normal-weight and overweight/obese adolescents:  
658 an automated fiber quantification tractography study. *Brain Imaging and Behavior*, *14*(1), 308–319.  
659 <https://doi.org/10.1007/s11682-019-00036-4>
- 660 Casey, B. J., Cannonier, T., Conley, M. I., Cohen, A. O., Barch, D. M., Heitzeg, M. M., Soules, M. E.,  
661 Teslovich, T., Dellarco, D. V., Garavan, H., Orr, C. A., Wager, T. D., Banich, M. T., Speer, N. K.,  
662 Sutherland, M. T., Riedel, M. C., Dick, A. S., Bjork, J. M., Thomas, K. M., ... Dale, A. M. (2018).  
663 The Adolescent Brain Cognitive Development (ABCD) study: Imaging acquisition across 21 sites.  
664 *Developmental Cognitive Neuroscience*, *32*, 43–54.  
665 <https://doi.org/https://doi.org/10.1016/j.dcn.2018.03.001>
- 666 Chiang, C. W., Wang, Y., Sun, P., Lin, T. H., Trinkaus, K., Cross, A. H., & Song, S. K. (2014).  
667 Quantifying white matter tract diffusion parameters in the presence of increased extra-fiber  
668 cellularity and vasogenic edema. *NeuroImage*, *101*, 310–319.  
669 <https://doi.org/10.1016/j.neuroimage.2014.06.064>
- 670 Cole, T. J., Faith, M. S., Pietrobelli, A., & Heo, M. (2005). What is the best measure of adiposity change  
671 in growing children: BMI, BMI %, BMI z-score or BMI centile? *European Journal of Clinical*  
672 *Nutrition*, *59*(3), 419–425. <https://doi.org/10.1038/sj.ejcn.1602090>
- 673 Cross, A. H., & Song, S. K. (2017). “A new imaging modality to non-invasively assess multiple sclerosis  
674 pathology.” *Journal of Neuroimmunology*, *304*, 81–85.  
675 <https://doi.org/10.1016/j.jneuroim.2016.10.002>
- 676 Daoust, J., Schaffer, J., Zeighami, Y., Dagher, A., García-García, I., & Michaud, A. (2021). White matter  
677 integrity differences in obesity: A meta-analysis of diffusion tensor imaging studies. *Neuroscience*  
678 *and Biobehavioral Reviews*, *129*, 133–141. <https://doi.org/10.1016/j.neubiorev.2021.07.020>
- 679 De Souza, C. T., Araujo, E. P., Bordin, S., Ashimine, R., Zollner, R. L., Boschero, A. C., Saad, M. J. A.,  
680 & Velloso, L. A. (2005). Consumption of a fat-rich diet activates a proinflammatory response and  
681 induces insulin resistance in the hypothalamus. *Endocrinology*, *146*(10), 4192–4199.  
682 <https://doi.org/10.1210/en.2004-1520>
- 683 Décarie-Spain, L., Sharma, S., Hryhorczuk, C., Issa-Garcia, V., Barker, P. A., Arbour, N., Alquier, T., &  
684 Fulton, S. (2018). Nucleus accumbens inflammation mediates anxiodepressive behavior and  
685 compulsive sucrose seeking elicited by saturated dietary fat. *Molecular Metabolism*, *10*, 1–13.  
686 <https://doi.org/10.1016/j.molmet.2018.01.018>
- 687 Dekkers, I. A., Jansen, P. R., & Lamb, H. J. (2019). Obesity, Brain Volume, and White Matter  
688 Microstructure at MRI: A Cross-sectional UK Biobank Study. *Radiology*, *291*(3), 763–  
689 771. <https://doi.org/10.1148/radiol.2019181012>
- 690 Dennis, E., Manza, P., & Volkow, N. D. (2022). Socioeconomic status, BMI, and brain development in  
691 children. *Translational Psychiatry*, *12*(1), 33. <https://doi.org/10.1038/s41398-022-01779-3>
- 692 Dorrance, A. M., Matin, N., & Pires, P. W. (2014). The effects of obesity on the cerebral vasculature.  
693 *Current Vascular Pharmacology*, *12*(3), 462–472.

- 694 <https://doi.org/10.2174/1570161112666140423222411>
- 695 Falorni, A., Bini, V., Molinari, D., Papi, F., Celi, F., Stefano, G. Di, Berioli, M. G., Bacosi, M. L., &  
696 Contessa, G. (1997). Leptin serum levels in normal weight and obese children and adolescents:  
697 relationship with age, sex, pubertal development, body mass index and insulin. *International*  
698 *Journal of Obesity*, 21(10), 881–890. <https://doi.org/10.1038/sj.ijo.0800485>
- 699 Fernández-Andújar, M., Morales-García, E., & García-Casares, N. (2021). Obesity and Gray Matter  
700 Volume Assessed by Neuroimaging: A Systematic Review. *Brain Sciences*, 11(8).  
701 <https://doi.org/10.3390/brainsci11080999>
- 702 Figlewicz, D. P. (2016). Expression of receptors for insulin and leptin in the ventral tegmental  
703 area/substantia nigra (VTA/SN) of the rat: Historical perspective. *Brain Research*, 1645, 68–70.  
704 <https://doi.org/https://doi.org/10.1016/j.brainres.2015.12.041>
- 705 Frischer, J. M., Bramow, S., Dal-Bianco, A., Lucchinetti, C. F., Rauschka, H., Schmidbauer, M., Laursen,  
706 H., Sorensen, P. S., & Lassmann, H. (2009). The relation between inflammation and  
707 neurodegeneration in multiple sclerosis brains. *Brain*, 132(5), 1175–1189.  
708 <https://doi.org/10.1093/brain/awp070>
- 709 Garavan, H., Bartsch, H., Conway, K., Decastro, A., Goldstein, R. Z., Heeringa, S., Jernigan, T., Potter,  
710 A., Thompson, W., & Zahs, D. (2018). Recruiting the ABCD sample: Design considerations and  
711 procedures. *Developmental Cognitive Neuroscience*, 32, 16–22.  
712 <https://doi.org/10.1016/j.dcn.2018.04.004>
- 713 García-García, I., Morys, F., & Dagher, A. (2020). Nucleus accumbens volume is related to obesity  
714 measures in an age-dependent fashion. *Journal of Neuroendocrinology*, 32(12), e12812.  
715 <https://doi.org/10.1111/jne.12812>
- 716 Gebremariam, M. K., Lien, N., Nianogo, R. A., & Arah, O. A. (2017). Mediators of socioeconomic  
717 differences in adiposity among youth: a systematic review. *Obesity Reviews : An Official Journal of*  
718 *the International Association for the Study of Obesity*, 18(8), 880–898.  
719 <https://doi.org/10.1111/obr.12547>
- 720 Geiger, B. M., Haburcak, M., Avena, N. M., Moyer, M. C., Hoebel, B. G., & Pothos, E. N. (2009).  
721 Deficits of mesolimbic dopamine neurotransmission in rat dietary obesity. *Neuroscience*, 159(4),  
722 1193–1199. <https://doi.org/https://doi.org/10.1016/j.neuroscience.2009.02.007>
- 723 Gómez-Apo, E., Mondragón-Maya, A., Ferrari-Díaz, M., & Silva-Pereyra, J. (2021). Structural Brain  
724 Changes Associated with Overweight and Obesity. *Journal of Obesity*, 2021, 6613385.  
725 <https://doi.org/10.1155/2021/6613385>
- 726 Gregor, M. F., & Hotamisligil, G. S. (2011). Inflammatory Mechanisms in Obesity. *Annual Review of*  
727 *Immunology*, 29(1), 415–445. <https://doi.org/10.1146/annurev-immunol-031210-101322>
- 728 Guillemot-Legrís, O., Masquelier, J., Everard, A., Cani, P. D., Alhouayek, M., & Muccioli, G. G. (2016).  
729 High-fat diet feeding differentially affects the development of inflammation in the central nervous  
730 system. *Journal of Neuroinflammation*, 13(1), 206. <https://doi.org/10.1186/s12974-016-0666-8>
- 731 Guillemot-Legrís, O., & Muccioli, G. G. (2017). Obesity-Induced Neuroinflammation: Beyond the  
732 Hypothalamus. In *Trends in Neurosciences* (Vol. 40, Issue 4, pp. 237–253). Elsevier Ltd.  
733 <https://doi.org/10.1016/j.tins.2017.02.005>
- 734 Hagler, D. J., Hatton, S., Cornejo, M. D., Makowski, C., Fair, D. A., Dick, A. S., Sutherland, M. T.,  
735 Casey, B. J., Barch, D. M., Harms, M. P., Watts, R., Bjork, J. M., Garavan, H. P., Hilmer, L., Pung,  
736 C. J., Sicat, C. S., Kuperman, J., Bartsch, H., Xue, F., ... Dale, A. M. (2019). Image processing and



- 737 analysis methods for the Adolescent Brain Cognitive Development Study. *NeuroImage*, 202,  
738 116091. [https://doi.org/https://doi.org/10.1016/j.neuroimage.2019.116091](https://doi.org/10.1016/j.neuroimage.2019.116091)
- 739 Hemmingsson, E. (2018). Early Childhood Obesity Risk Factors: Socioeconomic Adversity, Family  
740 Dysfunction, Offspring Distress, and Junk Food Self-Medication. *Current Obesity Reports*, 7(2),  
741 204–209. <https://doi.org/10.1007/s13679-018-0310-2>
- 742 Hommel, J. D., Trinko, R., Sears, R. M., Georgescu, D., Liu, Z.-W., Gao, X.-B., Thurmon, J. J.,  
743 Marinelli, M., & DiLeone, R. J. (2006). Leptin Receptor Signaling in Midbrain Dopamine Neurons  
744 Regulates Feeding. *Neuron*, 51(6), 801–810. <https://doi.org/10.1016/j.neuron.2006.08.023>
- 745 Jais, A., & Brüning, J. C. (2017). Hypothalamic inflammation in obesity and metabolic disease. *Journal*  
746 *of Clinical Investigation*, 127(1), 24–32. <https://doi.org/10.1172/JCI88878>
- 747 Jernigan, T. L., Brown, S. A., & Dowling, G. J. (2018). The Adolescent Brain Cognitive Development  
748 Study. *Journal of Research on Adolescence : The Official Journal of the Society for Research on*  
749 *Adolescence*, 28(1), 154–156. <https://doi.org/10.1111/jora.12374>
- 750 Jiang, F., Li, G., Ji, W., Zhang, Y., Wu, F., Hu, Y., Zhang, W., Manza, P., Tomasi, D., Volkow, N. D.,  
751 Gao, X., Wang, G.-J., & Zhang, Y. (2023). Obesity is associated with decreased gray matter volume  
752 in children: a longitudinal study. *Cerebral Cortex*, 33(7), 3674–3682.  
753 <https://doi.org/10.1093/cercor/bhac300>
- 754 Kamholz, J. A., & Garbern, J. Y. (2005). Neuronal cell injury precedes brain atrophy in multiple  
755 sclerosis. *Neurology*, 64(1), 176 LP – 176. <https://doi.org/10.1212/WNL.64.1.176>
- 756 Kempuraj, D., Thangavel, R., Natteru, P. A., Selvakumar, G. P., Saeed, D., Zahoor, H., Zaheer, S., Iyer,  
757 S. S., & Zaheer, A. (2016). Neuroinflammation Induces Neurodegeneration. *Journal of Neurology,*  
758 *Neurosurgery and Spine*, 1(1).
- 759 Killedar, A., Lung, T., Petrou, S., Teixeira-Pinto, A., Tan, E. J., & Hayes, A. (2020). Weight status and  
760 health-related quality of life during childhood and adolescence: effects of age and socioeconomic  
761 position. *International Journal of Obesity*, 44(3), 637–645. [https://doi.org/10.1038/s41366-020-](https://doi.org/10.1038/s41366-020-0529-3)  
762 [0529-3](https://doi.org/10.1038/s41366-020-0529-3)
- 763 King, S. J., Isaacs, A. M., O'Farrell, E., & Abizaid, A. (2011). Motivation to obtain preferred foods is  
764 enhanced by ghrelin in the ventral tegmental area. *Hormones and Behavior*, 60(5), 572–580.  
765 [https://doi.org/https://doi.org/10.1016/j.yhbeh.2011.08.006](https://doi.org/10.1016/j.yhbeh.2011.08.006)
- 766 Kranjac, A. W., Boyd, C., Kimbro, R. T., Moffett, B. S., & Lopez, K. N. (2021). Neighborhoods matter;  
767 but for whom? Heterogeneity of neighborhood disadvantage on child obesity by sex. *Health &*  
768 *Place*, 68, 102534. [https://doi.org/https://doi.org/10.1016/j.healthplace.2021.102534](https://doi.org/10.1016/j.healthplace.2021.102534)
- 769 Kuczmarski, R. J., Ogden, C. L., Guo, S. S., Grummer-Strawn, L. M., Flegal, K. M., Mei, Z., Wei, R.,  
770 Curtin, L. R., Roche, A. F., & Johnson, C. L. (2002). 2000 CDC Growth Charts for the United  
771 States: methods and development. *Vital and Health Statistics. Series 11, Data from the National*  
772 *Health Survey*, 246, 1–190.
- 773 Kullmann, S, Schweizer, F., Veit, R., Fritsche, A., & Preissl, H. (2015). Compromised white matter  
774 integrity in obesity. *Obesity Reviews*, 16(4), 273–281.  
775 [https://doi.org/https://doi.org/10.1111/obr.12248](https://doi.org/10.1111/obr.12248)
- 776 Kullmann, Stephanie, Callaghan, M. F., Heni, M., Weiskopf, N., Scheffler, K., Häring, H.-U., Fritsche,  
777 A., Veit, R., & Preissl, H. (2016). Specific white matter tissue microstructure changes associated  
778 with obesity. *NeuroImage*, 125, 36–44.  
779 [https://doi.org/https://doi.org/10.1016/j.neuroimage.2015.10.006](https://doi.org/10.1016/j.neuroimage.2015.10.006)

- 780 Lawrence, K. E., Abaryan, Z., Laltoo, E., Hernandez, L. M., Gandal, M. J., McCracken, J. T., &  
781 Thompson, P. M. (2022). White matter microstructure shows sex differences in late childhood:  
782 Evidence from 6797 children. *Human Brain Mapping*, *n/a*(*n/a*).  
783 <https://doi.org/https://doi.org/10.1002/hbm.26079>
- 784 Li, H., Nickerson, L. D., Nichols, T. E., & Gao, J.-H. (2017). Comparison of a non-stationary voxelation-  
785 corrected cluster-size test with TFCE for group-Level MRI inference. *Human Brain Mapping*, *38*(3),  
786 1269–1280. <https://doi.org/https://doi.org/10.1002/hbm.23453>
- 787 Li, Y., Thompson, W. K., Reuter, C., Nillo, R., Jernigan, T., Dale, A., Sugrue, L. P., Brown, J.,  
788 Dougherty, R. F., Rauschecker, A., Rudie, J., Barch, D. M., Calhoun, V., Hagler, D., Hatton, S.,  
789 Tanabe, J., Marshall, A., Sher, K. J., Heeringa, S., ... Brown, S. (2021). Rates of Incidental Findings  
790 in Brain Magnetic Resonance Imaging in Children. *JAMA Neurology*, *78*(5), 578–587.  
791 <https://doi.org/10.1001/jamaneurol.2021.0306>
- 792 Li, Z. A., Cai, Y., Taylor, R. L., Eisenstein, S. A., Barch, D. M., Marek, S., & Hershey, T. (2023).  
793 Associations between socioeconomic status and white matter microstructure in children: indirect  
794 effects via obesity and cognition. *MedRxiv*, 2023.02.09.23285150.  
795 <https://doi.org/10.1101/2023.02.09.23285150>
- 796 Liang, Y., Hou, D., Zhao, X., Wang, L., Hu, Y., Liu, J., Cheng, H., Yang, P., Shan, X., Yan, Y.,  
797 Cruickshank, J. K., & Mi, J. (2015). Childhood obesity affects adult metabolic syndrome and  
798 diabetes. *Endocrine*, *50*(1), 87–92. <https://doi.org/10.1007/s12020-015-0560-7>
- 799 Lin, T.-H., Chiang, C.-W., Perez-Torres, C. J., Sun, P., Wallendorf, M., Schmidt, R. E., Cross, A. H., &  
800 Song, S.-K. (2017). Diffusion MRI quantifies early axonal loss in the presence of nerve swelling.  
801 *Journal of Neuroinflammation*, *14*(1), 78. <https://doi.org/10.1186/s12974-017-0852-3>
- 802 Ling, J., Merideth, F., Caprihan, A., Pena, A., Teshiba, T., & Mayer, A. R. (2012). Head injury or head  
803 motion? Assessment and quantification of motion artifacts in diffusion tensor imaging studies.  
804 *Human Brain Mapping*, *33*(1), 50–62. <https://doi.org/10.1002/hbm.21192>
- 805 Ly, M., Raji, C. A., Yu, G. Z., Wang, Q., Wang, Y., Schindler, S. E., An, H., Samara, A., Eisenstein, S.  
806 A., Hershey, T., Smith, G., Klein, S., Liu, J., Xiong, C., Ances, B. M., Morris, J. C., & Benzinger, T.  
807 L. S. (2021). Obesity and White Matter Neuroinflammation Related Edema in Alzheimer’s Disease  
808 Dementia Biomarker Negative Cognitively Normal Individuals. *Journal of Alzheimer’s Disease*, *79*,  
809 1801–1811. <https://doi.org/10.3233/JAD-201242>
- 810 Mekonnen, T., Havdal, H. H., Lien, N., O’Halloran, S. A., Arah, O. A., Papadopoulou, E., &  
811 Gebremariam, M. K. (2020). Mediators of socioeconomic inequalities in dietary behaviours among  
812 youth: A systematic review. *Obesity Reviews*, *21*(7), e13016.  
813 <https://doi.org/https://doi.org/10.1111/obr.13016>
- 814 Molina, J., Joaquim, A., Bonamin, L. V., Martins, M. de F. M., Kirsten, T. B., Cardoso, C. V., Bernardi,  
815 M. M., & Bondan, E. F. (2020). Reduced astrocytic expression of GFAP in the offspring of female  
816 rats that received hypercaloric diet. *Nutritional Neuroscience*, *23*(6), 411–421.  
817 <https://doi.org/10.1080/1028415X.2018.1512783>
- 818 Neudorfer, C., Germann, J., Elias, G. J. B., Gramer, R., Boutet, A., & Lozano, A. M. (2020). A high-  
819 resolution in vivo magnetic resonance imaging atlas of the human hypothalamic region. *Scientific*  
820 *Data*, *7*(1), 305. <https://doi.org/10.1038/s41597-020-00644-6>
- 821 Palmer, C. E., Pecheva, D., Iversen, J. R., Hagler, D. J., Sugrue, L., Nedelec, P., Fan, C. C., Thompson,  
822 W. K., Jernigan, T. L., & Dale, A. M. (2022). Microstructural development from 9 to 14 years:  
823 Evidence from the ABCD Study. *Developmental Cognitive Neuroscience*, *53*, 101044.

- 824 <https://doi.org/https://doi.org/10.1016/j.dcn.2021.101044>
- 825 Patenaude, B., Smith, S. M., Kennedy, D. N., & Jenkinson, M. (2011). A Bayesian model of shape and  
826 appearance for subcortical brain segmentation. *NeuroImage*, *56*(3), 907–922.  
827 <https://doi.org/https://doi.org/10.1016/j.neuroimage.2011.02.046>
- 828 Pistell, P. J., Morrison, C. D., Gupta, S., Knight, A. G., Keller, J. N., Ingram, D. K., & Bruce-Keller, A. J.  
829 (2010). Cognitive impairment following high fat diet consumption is associated with brain  
830 inflammation. *Journal of Neuroimmunology*, *219*(1–2), 25–32.  
831 <https://doi.org/10.1016/j.jneuroim.2009.11.010>
- 832 R Core Team. (2013). *R: A language and environment for statistical computing*. R Foundation for  
833 Statistical Computing.
- 834 Raji, C. A., Ho, A. J., Parikshak, N. N., Becker, J. T., Lopez, O. L., Kuller, L. H., Hua, X., Leow, A. D.,  
835 Toga, A. W., & Thompson, P. M. (2010). Brain structure and obesity. *Human Brain Mapping*,  
836 *31*(3), 353–364. <https://doi.org/https://doi.org/10.1002/hbm.20870>
- 837 Rapuano, K. M., Berrian, N., Baskin-Sommers, A., Décarie-Spain, L., Sharma, S., Fulton, S., Casey, B.  
838 J., & Watts, R. (2022). Longitudinal Evidence of a Vicious Cycle Between Nucleus Accumbens  
839 Microstructure and Childhood Weight Gain. *Journal of Adolescent Health*.  
840 <https://doi.org/https://doi.org/10.1016/j.jadohealth.2022.01.002>
- 841 Rapuano, K. M., Laurent, J. S., Hagler, D. J., Hatton, S. N., Thompson, W. K., Jernigan, T. L., Dale, A.  
842 M., Casey, B. J., & Watts, R. (2020). Nucleus accumbens cytoarchitecture predicts weight gain in  
843 children. *Proceedings of the National Academy of Sciences*, *117*(43), 26977–26984.  
844 <https://doi.org/10.1073/pnas.2007918117>
- 845 Rapuano, K. M., Zieselman, A. L., Kelley, W. M., Sargent, J. D., Heatherton, T. F., & Gilbert-Diamond,  
846 D. (2017). Genetic risk for obesity predicts nucleus accumbens size and responsivity to real-world  
847 food cues. *Proceedings of the National Academy of Sciences*, *114*(1), 160 LP – 165.  
848 <https://doi.org/10.1073/pnas.1605548113>
- 849 Ricard, J. A., Parker, T. C., Dhamala, E., Kwasa, J., Allsop, A., & Holmes, A. J. (2023). Confronting  
850 racially exclusionary practices in the acquisition and analyses of neuroimaging data. *Nature*  
851 *Neuroscience*, *26*(1), 4–11. <https://doi.org/10.1038/s41593-022-01218-y>
- 852 Robin, X., Turck, N., Hainard, A., Tiberti, N., Lisacek, F., Sanchez, J.-C., & Müller, M. (2011). pROC:  
853 an open-source package for R and S+ to analyze and compare ROC curves. *BMC Bioinformatics*,  
854 *12*(1), 77. <https://doi.org/10.1186/1471-2105-12-77>
- 855 Samara, A., Li, Z., Rutlin, J., Raji, C. A., Sun, P., Song, S.-K., Hershey, T., & Eisenstein, S. A. (2021).  
856 Nucleus accumbens microstructure mediates the relationship between obesity and eating behavior in  
857 adults. *Obesity*.
- 858 Samara, A., Murphy, T., Strain, J., Rutlin, J., Sun, P., Neyman, O., Sreevalsan, N., Shimony, J. S., Ances,  
859 B. M., Song, S. K., Hershey, T., & Eisenstein, S. A. (2020). Neuroinflammation and White Matter  
860 Alterations in Obesity Assessed by Diffusion Basis Spectrum Imaging. *Frontiers in Human*  
861 *Neuroscience*, *13*. <https://doi.org/10.3389/fnhum.2019.00464>
- 862 Schur, E. A., Melhorn, S. J., Oh, S.-K., Lacy, J. M., Berkseth, K. E., Guyenet, S. J., Sonnen, J. A., Tyagi,  
863 V., Rosalynn, M., De Leon, B., Webb, M. F., Gonsalves, Z. T., Fligner, C. L., Schwartz, M. W., &  
864 Maravilla, K. R. (2015). Radiologic evidence that hypothalamic gliosis is associated with obesity  
865 and insulin resistance in humans. *Obesity*, *23*(11), 2142–2148.  
866 <https://doi.org/https://doi.org/10.1002/oby.21248>



- 867 Sewaybricker, L. E., Kee, S., Melhorn, S. J., & Schur, E. A. (2021). Greater radiologic evidence of  
868 hypothalamic gliosis predicts adiposity gain in children at risk for obesity. *Obesity*, 29(11), 1770–  
869 1779. <https://doi.org/https://doi.org/10.1002/oby.23286>
- 870 Sewaybricker, L. E., Melhorn, S. J., Papantoni, A., Webb, M. F., Hua, J., Roth, C. L., Carnell, S., &  
871 Schur, E. A. (2021). Pilot multi-site and reproducibility study of hypothalamic gliosis in children.  
872 *Pediatric Obesity*, 16(4), e12732. <https://doi.org/https://doi.org/10.1111/ijpo.12732>
- 873 Sewaybricker, L. E., Schur, E. A., Melhorn, S. J., Campos, B. M., Askren, M. K., Nogueira, G. A. S.,  
874 Zambon, M. P., Antonio, M. A. R. G. M., Cendes, F., Velloso, L. A., & Guerra-Junior, G. (2019).  
875 Initial evidence for hypothalamic gliosis in children with obesity by quantitative T2 MRI and  
876 implications for blood oxygen-level dependent response to glucose ingestion. *Pediatric Obesity*,  
877 14(2), e12486. <https://doi.org/https://doi.org/10.1111/ijpo.12486>
- 878 Shah, B., Tombeau Cost, K., Fuller, A., Birken, C. S., & Anderson, L. N. (2020). Sex and gender  
879 differences in childhood obesity: contributing to the research agenda. *BMJ Nutrition, Prevention &*  
880 *Health*, 3(2), 387–390. <https://doi.org/10.1136/bmjnph-2020-000074>
- 881 Simmonds, M., Llewellyn, A., Owen, C. G., & Woolacott, N. (2016). Predicting adult obesity from  
882 childhood obesity: a systematic review and meta-analysis. *Obesity Reviews*, 17(2), 95–107.  
883 <https://doi.org/https://doi.org/10.1111/obr.12334>
- 884 Smith, S. M., Jenkinson, M., Johansen-Berg, H., Rueckert, D., Nichols, T. E., Mackay, C. E., Watkins, K.  
885 E., Ciccarelli, O., Cader, M. Z., Matthews, P. M., & Behrens, T. E. J. (2006). Tract-based spatial  
886 statistics: Voxelwise analysis of multi-subject diffusion data. *NeuroImage*, 31(4), 1487–1505.  
887 <https://doi.org/https://doi.org/10.1016/j.neuroimage.2006.02.024>
- 888 Smith, S. M., Jenkinson, M., Woolrich, M. W., Beckmann, C. F., Behrens, T. E. J., Johansen-Berg, H.,  
889 Bannister, P. R., De Luca, M., Drobnjak, I., Flitney, D. E., Niazy, R. K., Saunders, J., Vickers, J.,  
890 Zhang, Y., De Stefano, N., Brady, J. M., & Matthews, P. M. (2004). Advances in functional and  
891 structural MR image analysis and implementation as FSL. *NeuroImage*, 23, S208–S219.  
892 <https://doi.org/https://doi.org/10.1016/j.neuroimage.2004.07.051>
- 893 Smith, S. M., & Nichols, T. E. (2009). Threshold-free cluster enhancement: Addressing problems of  
894 smoothing, threshold dependence and localisation in cluster inference. *NeuroImage*, 44(1), 83–98.  
895 <https://doi.org/https://doi.org/10.1016/j.neuroimage.2008.03.061>
- 896 Sochocka, M., Diniz, B. S., & Leszek, J. (2017). Inflammatory Response in the CNS: Friend or Foe?  
897 *Molecular Neurobiology*, 54(10), 8071–8089. <https://doi.org/10.1007/s12035-016-0297-1>
- 898 Spear, L. P. (2000). The adolescent brain and age-related behavioral manifestations. *Neuroscience &*  
899 *Biobehavioral Reviews*, 24(4), 417–463. [https://doi.org/https://doi.org/10.1016/S0149-](https://doi.org/https://doi.org/10.1016/S0149-7634(00)00014-2)  
900 [7634\(00\)00014-2](https://doi.org/https://doi.org/10.1016/S0149-7634(00)00014-2)
- 901 Stice, E., Yokum, S., Burger, K. S., Epstein, L. H., & Small, D. M. (2011). Youth at Risk for Obesity  
902 Show Greater Activation of Striatal and Somatosensory Regions to Food. *The Journal of*  
903 *Neuroscience*, 31(12), 4360 LP – 4366. <https://doi.org/10.1523/JNEUROSCI.6604-10.2011>
- 904 Stranahan, A. M., Hao, S., Dey, A., Yu, X., & Baban, B. (2016). Blood-brain barrier breakdown promotes  
905 macrophage infiltration and cognitive impairment in leptin receptor-deficient mice. *Journal of*  
906 *Cerebral Blood Flow and Metabolism : Official Journal of the International Society of Cerebral*  
907 *Blood Flow and Metabolism*, 36(12), 2108–2121. <https://doi.org/10.1177/0271678X16642233>
- 908 Sun, P., George, A., Perantie, D. C., Trinkaus, K., Ye, Z., Naismith, R. T., Song, S.-K., & Cross, A. H.  
909 (2020). Diffusion basis spectrum imaging provides insights into MS pathology. *Neurology* -

- 910 *Neuroimmunology Neuroinflammation*, 7(2), e655. <https://doi.org/10.1212/NXI.0000000000000655>
- 911 Tait, J. L., Collyer, T. A., Gall, S. L., Magnussen, C. G., Venn, A. J., Dwyer, T., Fraser, B. J., Moran, C.,  
912 Srikanth, V. K., & Callisaya, M. L. (2022). Longitudinal associations of childhood fitness and  
913 obesity profiles with midlife cognitive function: an Australian cohort study. *Journal of Science and*  
914 *Medicine in Sport*, 25(8), 667–672. <https://doi.org/https://doi.org/10.1016/j.jsams.2022.05.009>
- 915 Taylor, R. W., Jones, I. E., Williams, S. M., & Goulding, A. (2000). Evaluation of waist circumference,  
916 waist-to-hip ratio, and the conicity index as screening tools for high trunk fat mass, as measured by  
917 dual-energy X-ray absorptiometry, in children aged 3-19 y. *The American Journal of Clinical*  
918 *Nutrition*, 72(2), 490–495. <https://doi.org/10.1093/ajcn/72.2.490>
- 919 Thaler, J. P., Yi, C.-X., Schur, E. A., Guyenet, S. J., Hwang, B. H., Dietrich, M. O., Zhao, X., Sarruf, D.  
920 A., Izgur, V., Maravilla, K. R., Nguyen, H. T., Fischer, J. D., Matsen, M. E., Wisse, B. E., Morton,  
921 G. J., Horvath, T. L., Baskin, D. G., Tschöp, M. H., & Schwartz, M. W. (2012). Obesity is  
922 associated with hypothalamic injury in rodents and humans. *The Journal of Clinical Investigation*,  
923 122(1), 153–162. <https://doi.org/10.1172/JCI59660>
- 924 Valdearcos, M., Douglass, J. D., Robblee, M. M., Dorfman, M. D., Stifler, D. R., Bennett, M. L., Gerritse,  
925 I., Fasnacht, R., Barres, B. A., Thaler, J. P., & Koliwad, S. K. (2017). Microglial Inflammatory  
926 Signaling Orchestrates the Hypothalamic Immune Response to Dietary Excess and Mediates  
927 Obesity Susceptibility. *Cell Metabolism*, 26(1), 185-197.e3.  
928 <https://doi.org/10.1016/j.cmet.2017.05.015>
- 929 Vazquez, C. E., & Cubbin, C. (2020). Socioeconomic Status and Childhood Obesity: a Review of  
930 Literature from the Past Decade to Inform Intervention Research. *Current Obesity Reports*, 9(4),  
931 562–570. <https://doi.org/10.1007/s13679-020-00400-2>
- 932 Velloso, L. A., & Schwartz, M. W. (2011). Altered hypothalamic function in diet-induced obesity. In  
933 *International Journal of Obesity* (Vol. 35, Issue 12, pp. 1455–1465).  
934 <https://doi.org/10.1038/ijo.2011.56>
- 935 Verstynen, T. D., Weinstein, A. M., Schneider, W. W., Jakicic, J. M., Rofey, D. L., & Erickson, K. I.  
936 (2012). Increased body mass index is associated with a global and distributed decrease in white  
937 matter microstructural integrity. *Psychosomatic Medicine*, 74(7), 682–690.  
938 <https://doi.org/10.1097/PSY.0b013e318261909c>
- 939 Wang, G. J., Volkow, N. D., Logan, J., Pappas, N. R., Wong, C. T., Zhu, W., Netusll, N., & Fowler, J. S.  
940 (2001). Brain dopamine and obesity. *Lancet*, 357(9253), 354–357. [https://doi.org/10.1016/S0140-](https://doi.org/10.1016/S0140-6736(00)03643-6)  
941 [6736\(00\)03643-6](https://doi.org/10.1016/S0140-6736(00)03643-6)
- 942 Wang, X., Cusick, M. F., Wang, Y., Sun, P., Libbey, J. E., Trinkaus, K., Fujinami, R. S., & Song, S.-K.  
943 (2014). Diffusion basis spectrum imaging detects and distinguishes coexisting subclinical  
944 inflammation, demyelination and axonal injury in experimental autoimmune encephalomyelitis  
945 mice. *NMR in Biomedicine*, 27(7), 843–852. <https://doi.org/https://doi.org/10.1002/nbm.3129>
- 946 Wang, Y., Sun, P., Wang, Q., Trinkaus, K., Schmidt, R. E., Naismith, R. T., Cross, A. H., & Song, S. K.  
947 (2015). Differentiation and quantification of inflammation, demyelination and axon injury or loss in  
948 multiple sclerosis. *Brain*, 138(5), 1223–1238. <https://doi.org/10.1093/brain/awv046>
- 949 Wang, Y., Wang, Q., Haldar, J. P., Yeh, F.-C., Xie, M., Sun, P., Tu, T.-W., Trinkaus, K., Klein, R. S.,  
950 Cross, A. H., & Song, S.-K. (2011). Quantification of increased cellularity during inflammatory  
951 demyelination. *Brain : A Journal of Neurology*, 134(Pt 12), 3590–3601.  
952 <https://doi.org/10.1093/brain/awr307>

- 953 White, N. S., Leergaard, T. B., D’Arceuil, H., Bjaalie, J. G., & Dale, A. M. (2013). Probing tissue  
954 microstructure with restriction spectrum imaging: Histological and theoretical validation. *Human*  
955 *Brain Mapping*, 34(2), 327–346. <https://doi.org/https://doi.org/10.1002/hbm.21454>
- 956 Willette, A. A., & Kapogiannis, D. (2015). Does the brain shrink as the waist expands? *Ageing Research*  
957 *Reviews*, 20, 86–97. <https://doi.org/10.1016/j.arr.2014.03.007>
- 958 Winkler, A. M., Ridgway, G. R., Webster, M. A., Smith, S. M., & Nichols, T. E. (2014). Permutation  
959 inference for the general linear model. *NeuroImage*, 92, 381–397.  
960 <https://doi.org/https://doi.org/10.1016/j.neuroimage.2014.01.060>
- 961 Winklewski, P. J., Sabisz, A., Naumczyk, P., Jodzio, K., Szurowska, E., & Szarmach, A. (2018).  
962 Understanding the physiopathology behind axial and radial diffusivity changes-what do we Know?  
963 In *Frontiers in Neurology* (Vol. 9, Issue FEB). Frontiers Media S.A.  
964 <https://doi.org/10.3389/fneur.2018.00092>
- 965 Wisniewski, A. B., & Chernausek, S. D. (2009). Gender in childhood obesity: Family environment,  
966 hormones, and genes. *Gender Medicine*, 6, 76–85.  
967 <https://doi.org/https://doi.org/10.1016/j.genm.2008.12.001>
- 968 World Health Organization. (2021). *Obesity and overweight*. [https://www.who.int/en/news-room/fact-](https://www.who.int/en/news-room/fact-sheets/detail/obesity-and-overweight)  
969 [sheets/detail/obesity-and-overweight](https://www.who.int/en/news-room/fact-sheets/detail/obesity-and-overweight)
- 970 Wu, C., Garamszegi, S. P., Xie, X., & Mash, D. C. (2017). Altered Dopamine Synaptic Markers in  
971 Postmortem Brain of Obese Subjects . In *Frontiers in Human Neuroscience* (Vol. 11, p. 386).  
972 <https://www.frontiersin.org/article/10.3389/fnhum.2017.00386>
- 973 Yang, R., Lin, T.-H., Zhan, J., Lai, S., Song, C., Sun, P., Ye, Z., Wallendorf, M., George, A., Cross, A.  
974 H., & Song, S.-K. (2021). Diffusion basis spectrum imaging measures anti-inflammatory and  
975 neuroprotective effects of fingolimod on murine optic neuritis. *NeuroImage. Clinical*, 31, 102732.  
976 <https://doi.org/10.1016/j.nicl.2021.102732>
- 977 Yendiki, A., Koldewyn, K., Kakunoori, S., Kanwisher, N., & Fischl, B. (2014). Spurious group  
978 differences due to head motion in a diffusion MRI study. *NeuroImage*, 88, 79–90.  
979 <https://doi.org/10.1016/j.neuroimage.2013.11.027>
- 980 Zhan, J., Lin, T.-H., Libbey, J. E., Sun, P., Ye, Z., Song, C., Wallendorf, M., Gong, H., Fujinami, R. S., &  
981 Song, S.-K. (2018). Diffusion Basis Spectrum and Diffusion Tensor Imaging Detect Hippocampal  
982 Inflammation and Dendritic Injury in a Virus-Induced Mouse Model of Epilepsy . In *Frontiers in*  
983 *Neuroscience* (Vol. 12, p. 77). <https://www.frontiersin.org/article/10.3389/fnins.2018.00077>
- 984
